# Supplementary material for: A Batf3/Nlrp3/IL-18 Axis Promotes Natural Killer Cell IL-10 Production during Listeria monocytogenes Infection
Source: PubMed Central journal article supplement — Cell Rep. Author manuscript; Available in PMC 2018 Oct 3. (PMC6170157; doi:10.1016/j.celrep.2018.04.106), 2018-05-29
Supplement: NIHMS973254-supplement-2.pdf [file NIHMS973254-supplement-2.pdf]

# Cell Reports

## A *Batf3/Nlrp3/IL-18* Axis Promotes Natural Killer Cell IL-10 Production during *Listeria monocytogenes* Infection

### Graphical Abstract

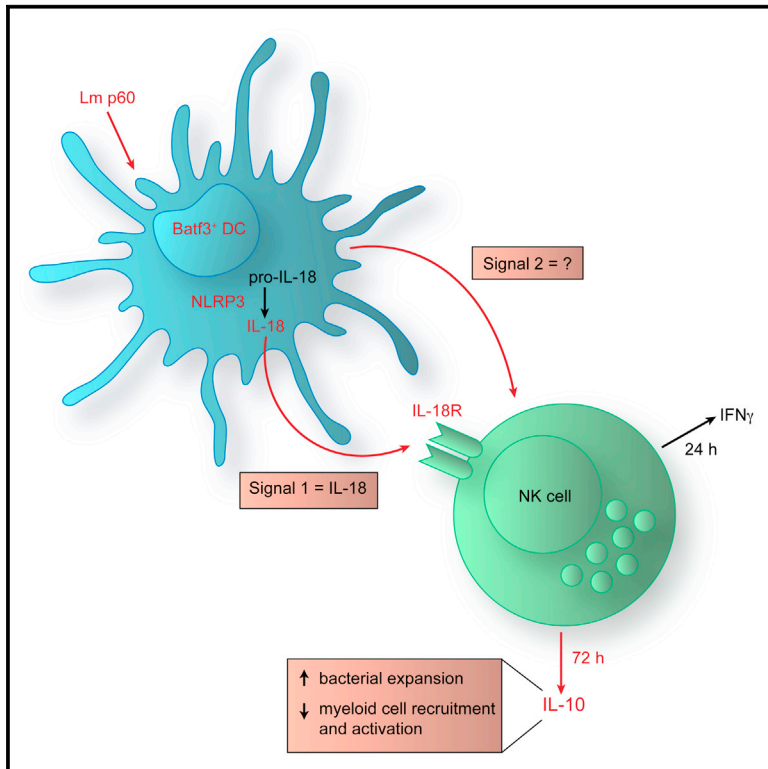

### Authors

Sarah E. Clark, Rebecca L. Schmidt, Daniel S. McDermott, Laurel L. Lenz

### Correspondence

laurel.lenz@ucdenver.edu

### In Brief

Clark et al. show that a bacterial pathogen suppresses protective immunity through an inflammasome-dependent pathway. Stimulation of NLRP3-dependent interleukin (IL)-18 release licenses NK cells to produce the anti-inflammatory molecule IL-10. *Batf3*-dependent cells are vital for IL-18 release, which drives this regulatory natural killer cell activity.

### Highlights

- NLRP3 inflammasome-dependent IL-18 limits host protection against *Listeria*
- *Batf3*-dependent cells are a critical source of immune-suppressive IL-18
- IL-18 acts directly on NK cells to license their secretion of IL-10
- IL-18 promotion of NK cell IL-10 is independent of IL-12 and cell contact

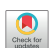

# A *Batf3/Nlrp3/IL-18* Axis Promotes Natural Killer Cell IL-10 Production during *Listeria monocytogenes* Infection

Sarah E. Clark,<sup>1</sup> Rebecca L. Schmidt,<sup>2,3</sup> Daniel S. McDermott,<sup>1</sup> and Laurel L. Lenz<sup>1,2,4,\*</sup>

<sup>1</sup>Department of Immunology and Microbiology, University of Colorado School of Medicine, Aurora, CO 80045, USA

<sup>2</sup>Department of Biomedical Research, National Jewish Health, Denver, CO 80206, USA

<sup>3</sup>Present address: Department of Biology and Chemistry, Upper Iowa University, Fayette, IA 52142, USA

<sup>4</sup>Lead Contact

\*Correspondence: [laurel.lenz@ucdenver.edu](mailto:laurel.lenz@ucdenver.edu)

<https://doi.org/10.1016/j.celrep.2018.04.106>

## SUMMARY

The bacterial pathogen *Listeria monocytogenes* (Lm) capitalizes on natural killer (NK) cell production of regulatory interleukin (IL)-10 to establish severe systemic infections. Here, we identify regulators of this IL-10 secretion. We show that IL-18 signals to NK cells license their ability to produce IL-10. IL-18 acts independent of IL-12 and STAT4, which co-stimulate IFN $\gamma$  secretion. Dendritic cell (DC) expression of *Nlrp3* is required for IL-18 release in response to the Lm p60 virulence protein. Therefore, mice lacking *Nlrp3*, *Il18*, or *Il18R* fail to accumulate serum IL-10 and are highly resistant to systemic Lm infection. We further show that cells expressing or dependent on *Batf3* are required for IL-18-inducing IL-10 production observed in infected mice. These findings explain how *Il18* and *Batf3* promote susceptibility to bacterial infection and demonstrate the ability of Lm to exploit NLRP3 for the promotion of regulatory NK cell activity.

## INTRODUCTION

Natural killer (NK) cells are a subset of type I innate lymphoid cells (ILCs) that respond to infection early after pathogen encounter and make important contributions to shaping the developing immune response (Vivier et al., 2011). NK cell activity is influenced by a combination of signals, including cell surface ligands, the cytokine milieu, and interactions with dendritic cells (DCs) (Cella, 2014; Lanier, 2008). Activated NK cells directly kill infected or cancerous cells and secrete diverse immune-regulatory factors, including the signature pro- and anti-inflammatory cytokines interferon  $\gamma$  (IFN $\gamma$ ) and interleukin-10 (IL-10). NK cell cytolytic activity and IFN $\gamma$  production promote protective immunity during viral infections and in tumors; hence, strategies that boost these NK cell responses have direct clinical relevance (Knorr et al., 2014; Vivier et al., 2012). However, NK cell activation has deleterious effects on immune resistance in certain bacterial infection models (Kerr et al., 2005; Takada et al., 1994; Teixeira and Kaufmann, 1994). Recent work using a *Listeria monocytogenes*

(Lm) infection model showed that the detrimental effects in this setting are dependent on NK cell production of IL-10, which suppresses accumulation and antimicrobial effector functions of inflammatory myeloid cell populations (Clark et al., 2016). IL-10 production is exploited by diverse microbial pathogens (Cytkor and Turner, 2011). However, the signals required to induce NK cell IL-10 production during bacterial infection remain undefined. One prior study identified DC secretion of IL-12 as critical for NK cell IL-10 in a murine model of *Toxoplasma gondii* infection (Perona-Wright et al., 2009). It has not been determined whether IL-12 contributes to NK cell IL-10 production during bacterial infections.

Lm is a bacterial pathogen responsible for foodborne human infections ranging from acute gastroenteritis to bacteremia, meningitis, and miscarriages (Hof, 2003). Systemic Lm infections are most commonly reported in elderly, immune-compromised, and pregnant individuals (Swaminathan and Gerner-Smith, 2007). The basis for the increased susceptibility in these populations remains unclear. However, in murine models, the production of IL-10 by NK cells profoundly increases host susceptibility (Clark et al., 2016). NK cells are activated early after systemic Lm infection and are a major source of initial IFN $\gamma$  (Humann et al., 2007; Kang et al., 2008). The signaling requirements for NK cell IFN $\gamma$  secretion in response to Lm are well defined and include direct contact with DCs and local secretion of IL-12 and IL-18 (Humann and Lenz, 2010; Lochner et al., 2008). IL-18 was originally identified as an IFN $\gamma$ -inducing factor that co-stimulates Th1-type inflammatory responses (Okamura et al., 1995). IL-18 is synthesized as an inactive pro-cytokine whose secretion and biological activity require proteolytic cleavage by one of several multi-molecular complexes termed “inflammasomes.” Inflammasomes contain the protease caspase-1, the ASC adaptor protein, and one of several different sensor molecules (Broz and Dixit, 2016). In cultured macrophages, Lm elicits IL-18 release through activation of inflammasome sensors, including NLRP3 (Hagar and Miao, 2014; Kim et al., 2010; Wu et al., 2010). Here we examine the effect of NLRP3 expression on cytokine secretion and susceptibility during *in vivo* Lm infection.

Lm expression of the secreted p60 protein has been shown to promote NK cell IFN $\gamma$  production during systemic infection (Clark et al., 2016; Humann et al., 2007). When modeled *in vitro*, Lm expression of p60 increases secretion of IFN $\gamma$

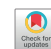

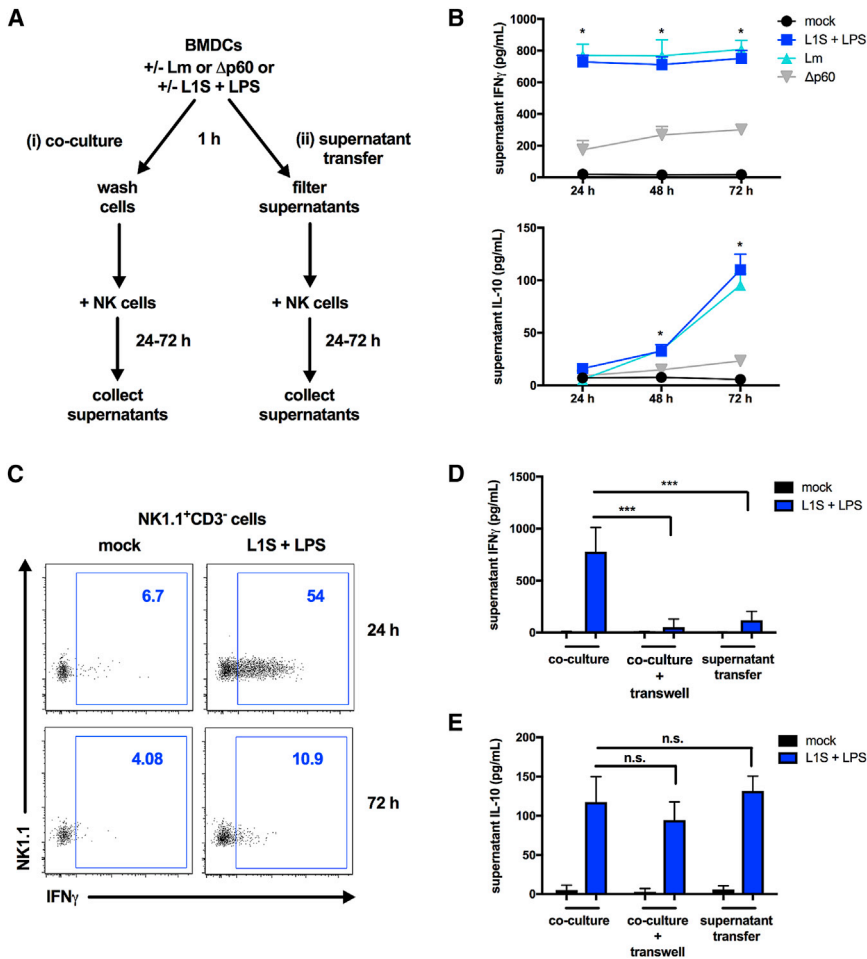

**Figure 1. Soluble Factors from BMDCs Suffice to License NK Cell IL-10 Production**

(A) Schematic of the *in vitro* co-culture and supernatant transfer systems.

(B) Supernatant IFN $\gamma$  and IL-10 detected 24, 48, and 72 hr after NK cell co-culture with L1S+LPS-stimulated or Lm-infected B6.*110*<sup>-/-</sup> BMDCs (n = 3 independent experiments pooled).

(C) Intracellular IFN $\gamma$  produced by NK1.1<sup>+</sup>CD3<sup>-</sup> cells 24 hr and 72 hr after co-culture (representative of n = 3 experiments).

(D and E) Supernatant cytokines detected 24 hr (IFN $\gamma$ , D) or 72 hr (IL-10, E) following NK cell exposure to L1S+LPS-stimulated B6.*110*<sup>-/-</sup> BMDCs in co-culture with or without separation with a 0.4  $\mu$ M transwell insert or exposed to filtered supernatants collected 1 hr post-stimulation from BMDCs, as indicated (n = 3 independent experiments pooled).

Data are displayed as mean  $\pm$  SEM; \*p < 0.05 and \*\*\*p < 0.001 as measured by t test.

like transcription factor 3 (Batf3) are crucial regulators of DC IL-18 secretion in response to Lm/p60. Thus, NK cell IL-10 production fails to occur during systemic infection of mice lacking *I18*, *I18R*, *Nlrp3*, or *Batf3*, and each of these strains is highly resistant to systemic Lm infection. These results demonstrate a host-detrimental role for NLRP3 and provide a mechanism to explain host-detrimental effects of Batf3, CD8 $\alpha$ <sup>+</sup> DCs, and IL-18 in the Lm infection model. Our results further show that Lm p60 selectively targets Batf3-depend-

ent cells to ensure that sufficient IL-18 is produced to license NK cell IL-10 production that dampens host inflammatory and anti-microbial host responses.

from NK cells co-cultured with infected bone marrow-derived DCs (BMDCs) (Schmidt et al., 2011). Treatment of BMDCs or human monocyte-derived DCs with recombinant p60 protein was also shown to promote activation of co-cultured NK cells (Clark et al., 2016; Schmidt et al., 2011). The recombinant p60 protein binds mouse BMDCs and was observed to stimulate NLRP3-dependent release of IL-1 $\beta$  and IL-18 (Schmidt and Lenz, 2012). These stimulatory effects of p60 map to the “L1S” region of the protein, and a recombinant protein containing just this region retains these activities (Clark et al., 2016; Schmidt et al., 2011; Schmidt and Lenz, 2012). BMDCs infected with Lm or treated with L1S require direct interaction with NK cells in addition to secretion of IL-12 and IL-18 to elicit NK cell IFN $\gamma$  secretion (Schmidt et al., 2011). The mechanisms by which Lm infection stimulates NK cell IL-10 production have not been previously investigated. Thus, it remains unknown whether IFN $\gamma$  and IL-10 production might be induced by different signals to NK cells.

In the current study, we identify IL-18 as a crucial factor that acts directly on NK cells to license their production of IL-10 during systemic Lm infection. We show that this response is not dependent on IL-12 or other activators of STAT4. We further reveal that NLRP3 and the basic leucine zipper ATF-

dependent cells to ensure that sufficient IL-18 is produced to license NK cell IL-10 production that dampens host inflammatory and anti-microbial host responses.

## RESULTS

### Soluble Factors from BMDCs Suffice to License NK Cell IL-10 Production

To investigate the requirements for Lm-induced NK cell IL-10 production, we used an established cell co-culture model (Figure 1A). BMDCs from B6.*110*<sup>-/-</sup> mice were infected with live wild-type (WT) or p60-deficient ( $\Delta$ p60) Lm strains. As reported previously, WT and  $\Delta$ p60 Lm infect and replicate similarly in mammalian cells (Lenz et al., 2003; Schmidt et al., 2011). Alternatively, BMDCs were treated with a priming agent (lipopolysaccharide [LPS]) plus recombinant L1S protein, which is derived from the N terminus of the Lm p60 virulence protein. Purified splenic NK cells were either added to the BMDCs (“co-culture”) or cultured with filtered supernatants harvested 1 hr after BMDC treatment (“supernatant transfer”). NK cell culture supernatants were analyzed 24–72 hr later for IFN $\gamma$  and IL-10. As previously shown for NK cells responding during systemic Lm infection

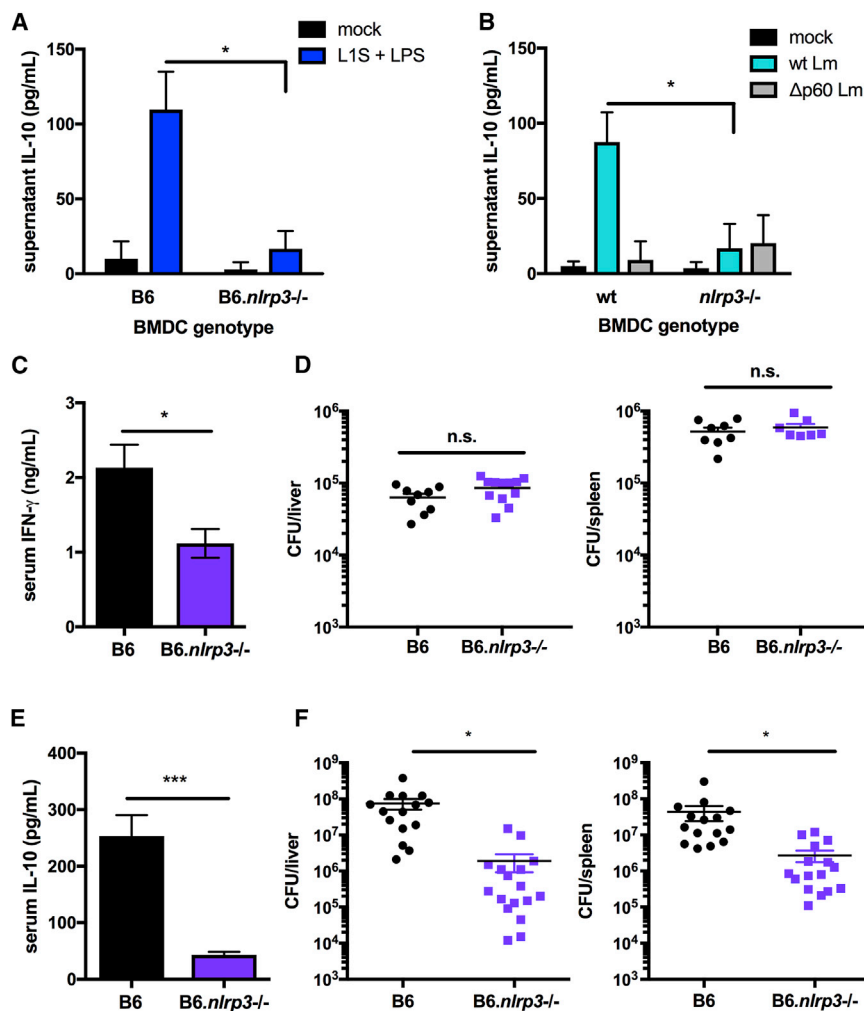

**Figure 2. NLRP3 Regulates NK Cell IL-10 Production and Increases Susceptibility to Lm**

(A and B) Supernatant IL-10 detected from NK cell cultures 72 hr after exposure to filtered supernatants from 1 hr L1S+LPS stimulation (A) or WT or  $\Delta$ p60 Lm infection (B) of B6 or B6.Nlrp3<sup>-/-</sup> BMDCs (n = 3 independent experiments pooled). (C and D) Serum IFN $\gamma$  (C) and Lm burdens shown as colony-forming units (CFUs) per organ (D) from B6 or B6.Nlrp3<sup>-/-</sup> mice sacrificed 24 hpi with 10<sup>4</sup> Lm i.v. (E and F) Serum IL-10 (E) and Lm burdens per organ (F) from B6 or B6.Nlrp3<sup>-/-</sup> mice sacrificed 72 hpi (n = 3 independent experiments pooled with 3–5 mice per group for *in vivo* experiments). Data are displayed as mean  $\pm$  SEM; \*p < 0.05 and \*\*\*p < 0.001 as measured by t test.

(Clark et al., 2016), IFN $\gamma$  was detected in co-cultures by 24 hr, whereas IL-10 accumulated at later time points (Figure 1B). Although IFN $\gamma$  persisted in the supernatants of the co-cultures, few NK cells produced this cytokine after 24 hr (Figure 1C). Both IFN $\gamma$  and IL-10 production from NK cells was greatly reduced when BMDCs were infected with p60-deficient ( $\Delta$ p60) Lm, confirming the important role of this Lm factor for the induction of NK cell activity. IFN $\gamma$  production by NK cells during Lm infection is known to require both soluble factors released from infected accessory cells (e.g., DCs) and direct contact with these cells (Humann and Lenz, 2010; Kang et al., 2008; Schmidt et al., 2011). The requirement for contact is thought to reflect the need to form a synapse between mature dendritic cells and NK cells to direct cytokines and other signals necessary to trigger NK cell IFN $\gamma$  secretion (Borg et al., 2004). Consistent with this interpretation, very little IFN $\gamma$  was produced when NK cells were separated from the BMDCs using a transwell membrane or cultured with filtered supernatants from L1S+LPS-stimulated BMDCs (Figure 1D). In contrast, significant IL-10 production was still observed in cultures where NK cells and

factors from BMDCs that suffice to license IL-10 (but not IFN $\gamma$ ) secretion from NK cells in the absence of synapse formation.

### NLRP3 Regulates NK Cell IL-10 Production and Increases Susceptibility to Lm

L1S+LPS treatment of BMDCs was shown previously to activate NLRP3-dependent release of IL-1 $\beta$  and IL-18 (Schmidt and Lenz, 2012). We therefore asked whether NLRP3 inflammasome activity was required for release of IL-10-inducing factors from stimulated BMDCs. NK cells purified from spleens of B6 mice were exposed to supernatants harvested 1 hr after stimulation of WT B6 or B6.Nlrp3<sup>-/-</sup> BMDCs with or without L1S+LPS. Supernatants from L1S+LPS (but not mock) stimulated B6 BMDCs induced significant IL-10 production in 72-hr NK cell cultures (Figure 2A). IL-10 production in NK cell cultures exposed to supernatants from B6 BMDCs was similar to that from B6.I110<sup>-/-</sup> BMDCs (compare with Figure 1E). Thus, the capacity of BMDCs to produce IL-10 did not alter their ability to stimulate NK cell IL-10. The 1-hr stimulation was not sufficient to induce release of IL-10 into BMDC supernatants (Figure S2A), indicating that

NK cells were the source of IL-10 in these experiments. In contrast to B6 BMDC supernatants, those collected from L1S+LPS-stimulated B6.*Nlrp3*<sup>-/-</sup> BMDCs failed to elicit NK cell IL-10 production (Figure 2A). Supernatants from Lm-infected B6.*Nlrp3*<sup>-/-</sup> BMDCs also lacked the ability to induce NK cell IL-10 production (Figure 2B). In addition, B6.*Nlrp3*<sup>-/-</sup> BMDCs treated with L1S+LPS or infected with Lm were very poor at inducing IFN $\gamma$  production by co-cultured NK cells (Figures S2B and S2C).

To further evaluate the requirements for NLRP3 in the regulation of *in vivo* NK cell activation, we quantified serum IFN $\gamma$  and IL-10 production 24 and 72 hr after systemic (intravenous [i.v.]) infection with 10<sup>4</sup> Lm of B6 and B6.*Nlrp3*<sup>-/-</sup> mice. In this model, serum IFN $\gamma$  at 24 hr post-infection (hpi) is derived from both NK and T cells (Schmidt et al., 2011), whereas IL-10 at 72 hr is entirely dependent on NK cells (Clark et al., 2016). Compared with infected WT mice, serum IFN $\gamma$  was significantly reduced, but still detectable, in infected B6.*Nlrp3*<sup>-/-</sup> mice (Figure 2C). Consistent with these results, the proportion of intracellular IFN $\gamma$ <sup>+</sup> NK cells in the spleens of infected B6.*Nlrp3*<sup>-/-</sup> was significantly reduced, whereas IFN $\gamma$ <sup>+</sup> T cells were unaffected (Figure S2D). Reduced NK cell IFN $\gamma$  was not attributable to differences in bacterial burdens because these were equivalent in WT and B6.*Nlrp3*<sup>-/-</sup> mice at 24 hpi (Figure 2D). At 72 hpi, we observed an almost complete absence of serum IL-10 in the infected B6.*Nlrp3*<sup>-/-</sup> mice (Figure 2E). At this time point, we further observed significantly reduced Lm burdens in the spleens and livers of B6.*Nlrp3*<sup>-/-</sup> mice (Figure 2F). NK cells are responsible for this IL-10 production in WT B6 mice, permitting robust Lm replication during systemic infection (Clark et al., 2016). These data implicate NLRP3 as a key factor regulating the activation of NK cells during systemic Lm infection and show that the net effect of *Nlrp3* expression in this model is the promotion of NK cell IL-10 production, resulting in increased host susceptibility.

### NLRP3 Regulates IL-18 Release Required for NK Cell IL-10 Production in Response to Lm or L1S+LPS

The known ability of IL-18 and IL-12 to regulate NK cell IFN $\gamma$  production (Fehniger et al., 1999; Tomura et al., 1998) suggested that NLRP3 might affect NK cell activity by regulating the release of IL-18. To address whether IL-18 could promote NK cell IL-10 production, we first confirmed that treatment with L1S+LPS stimulated release of IL-18 from B6 BMDCs (Figure 3A). These experiments further showed that B6.*Nlrp3*<sup>-/-</sup> BMDCs fail to release IL-18 in response to LPS+L1S. BMDC expression of NLRP3 and Lm expression of p60 were furthermore required for secretion of IL-18 in response to Lm infection of BMDCs (Figure 3B). We next evaluated the profile of IL-18 production in B6.*Nlrp3*<sup>-/-</sup> mice during systemic Lm infection. In infected B6 mice, we observed that serum IL-18 concentrations increased in parallel with those of serum IL-10 (Figure 3C). Compared with B6 mice infected in parallel, B6.*Nlrp3*<sup>-/-</sup> mice had significantly reduced serum IL-18 at 72 hpi (Figure 3D). These data suggest that NLRP3 expression regulates the release and accumulation of mature IL-18 in the sera of Lm-infected mice.

Consistent with a critical role for IL-18 in regulation of NK cell IL-10 production, we further observed that, at 72 hpi, serum IL-10 concentrations (Figure 3E) and bacterial burdens (Fig-

ure 3F) were significantly lower in B6.*Il18*<sup>-/-</sup> versus control B6 mice. Lm burdens were not significantly different in B6 and B6.*Il18*<sup>-/-</sup> mice at 24 hpi despite reduced serum IFN $\gamma$  in the latter (Figure S3A). These data suggest that impaired induction of NK cell IL-10 is responsible for the previously reported resistance of *Il18*<sup>-/-</sup> animals (Lochner et al., 2008). Cell culture experiments further demonstrated that 1-hr supernatants from L1S+LPS-stimulated (Figure 3G) or Lm-infected (Figure 3H) B6.*Il18*<sup>-/-</sup> BMDCs did not support NK cell IL-10 production. In contrast, B6 and B6.*Il18*<sup>-/-</sup> NK cells secreted equivalent levels of IL-10 in response to supernatants from L1S+LPS-stimulated B6 BMDCs (Figure S3B). Importantly, recombinant IL-18 restored the ability of supernatants from B6.*Il18*<sup>-/-</sup> BMDCs to promote NK cell IL-10 production (Figures 3G and 3H). However, the addition of recombinant IL-18 alone did not induce NK cell IL-10 production in the absence of conditioned BMDC supernatants. These data demonstrate that BMDC release of IL-18 and an additional factor(s) together elicit IL-10 production by NK cells. To more directly assess whether this additional factor(s) might also be dependent on NLRP3, B6 or B6.*Nlrp3*<sup>-/-</sup> BMDCs were stimulated with L1S+LPS or infected with Lm. Supernatants were harvested at 1 hr, filtered, and added to purified NK cells in the presence of recombinant IL-18. The results indicated that IL-18 fully complemented the ability of stimulated B6.*Nlrp3*<sup>-/-</sup> BMDC supernatants to induce NK cell IL-10 production (Figures 3I and 3J). IL-18 also rescued NK cell IFN $\gamma$  production in co-cultures with L1S+LPS-stimulated or Lm-infected B6.*Nlrp3*<sup>-/-</sup> BMDCs (Figures S3C and S3D). Unlike L1S+LPS, activation of BMDC NLRP3 using ATP or alum with or without LPS did not support NK cell IL-10 production (Figures S3E and S3F). These data show that NLRP3 regulation of NK cell IL-10 production is due to its ability to facilitate IL-18 release, although additional NLRP3-independent factors are also required for the activation of NK cell IL-10 in response to Lm or L1S+LPS.

### IL-18 Acts on NK Cells to License IL-10 Secretion Independent of IL-12/STAT4 Signaling

To address whether IL-18 must directly act on NK cells to promote their production of IL-10, we first evaluated cell surface IL-18R1 staining on NK cells from tissues of Lm-infected B6.*tiger* mice, which carry an IL-10 GFP reporter (Kamanaka et al., 2006). Essentially all of the GFP<sup>+</sup> cells observed at 72 hpi were found to co-stain positively for cell surface IL-18R1 (Figure 4A). We therefore studied the effects of *Il18r1* deficiency. B6 and B6.*Il18r1*<sup>-/-</sup> mice were infected with 10<sup>4</sup> Lm i.v. and evaluated 72 hr later. As for B6.*Il18*<sup>-/-</sup> and B6.*Nlrp3*<sup>-/-</sup> mice, the absence of IL-18R1 was associated with loss of serum IL-10 and significantly reduced bacterial burdens at 72 hpi (Figure 4B). Next, B6.*Il10*<sup>-/-</sup> BMDCs were infected with WT Lm or treated with L1S+LPS and cultured with purified splenic B6 or B6.*Il18r1*<sup>-/-</sup> NK cells. In contrast to co-cultures with B6 NK cells, no IL-10 was produced in cultures containing only B6.*Il18r1*<sup>-/-</sup> NK cells (Figure 4C). Expression of IL-18R1 by NK cells was also required for IL-10 production in response to filtered supernatants from L1S+LPS-stimulated B6.*Il10*<sup>-/-</sup> BMDCs (Figure 4D). Thus, IL-18 acts on NK cells, rather than BMDCs, to license NK cell production of IL-10.

It is well established that IL-18 signaling synergizes with IL-12 to promote NK cell secretion of IFN $\gamma$  (Chaix et al., 2008; Fehniger

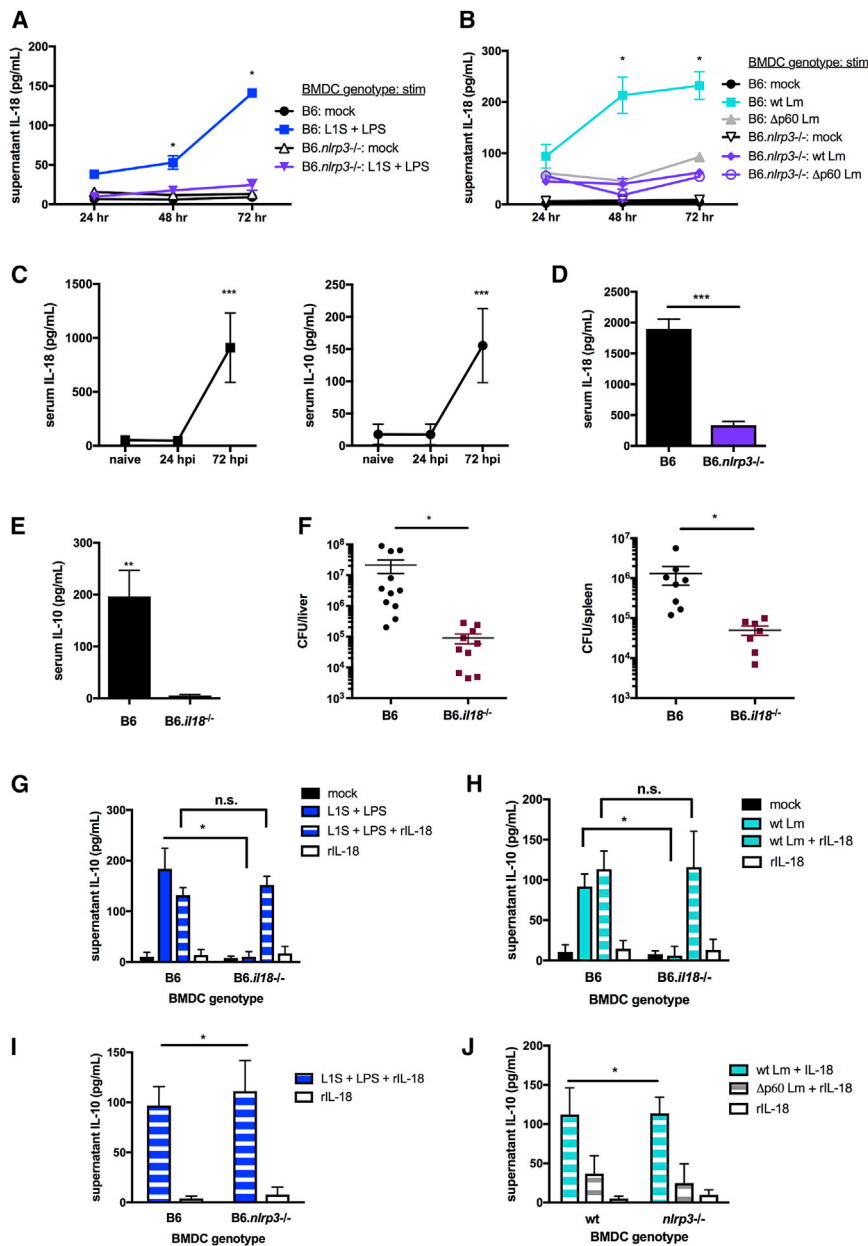

**Figure 3. NLRP3 Regulates IL-18 Release Required for NK Cell IL-10 Production in Response to Lm or L1S+LPS**

(A and B) Supernatant IL-18 detected at the indicated times post-stimulation with L1S+LPS (A) or infection with WT or  $\Delta$ p60 Lm (B) of B6 or  $B6.Nlrp3^{-/-}$  BMDCs ( $n = 3$  independent experiments pooled).

(C) Serum IL-10 and IL-18 detected in uninfected (naive) or Lm-infected ( $10^4$  i.v.) B6 mice at the indicated time points.

(D) Serum IL-18 detected in B6 or  $B6.Nlrp3^{-/-}$  mice sacrificed 72 hpi.

(E and F) Serum IL-10 (E) and Lm burdens per organ (F) from B6 or  $B6.I18^{-/-}$  mice sacrificed 72 hpi ( $n = 3$  independent experiments pooled with 3–5 mice per group for *in vivo* experiments).

(G and H) Supernatant IL-10 detected in NK cell cultures 72 hr after exposure to filtered supernatants from 1 hr L1S+LPS stimulation (G) or WT or  $\Delta$ p60 Lm infection (H) of B6 or  $B6.I18^{-/-}$  BMDCs with or without 50 pg/mL rIL-18 added to NK cell cultures.

(I and J) Supernatant IL-10 detected in NK cell cultures 72 hr after exposure to filtered supernatants from 1 hr L1S+LPS stimulation (I) or WT or  $\Delta$ p60 Lm infection (J) of B6 or  $B6.Nlrp3^{-/-}$  BMDCs + 50 pg/mL rIL-18 added to NK cell cultures ( $n = 3$  independent experiments pooled for *in vitro* experiments).

Data are displayed as mean  $\pm$  SEM; \* $p < 0.05$ , \*\* $p < 0.01$ , and \*\*\* $p < 0.001$  as measured by t test.

confirmed that culture of purified B6 NK cells with recombinant IL-12 and IL-2 elicited IL-10 secretion and that this was inhibited by treatment with the STAT4 inhibitor lisofylline (Figure 4H). However, when co-cultured NK cells were treated with lisofylline, they retained the ability to produce IL-10 in response to both L1S+LPS-stimulated and Lm-infected BMDCs (Figure 4I). Thus, neither IL-12 nor other STAT4-activating factors were required for LPS+L1S-elicited IL-10 production by NK cells. Moreover, although

et al., 1999). Consequently, little  $IFN\gamma$  was detected in L1S+LPS-stimulated co cultures of  $B6.I18^{-/-}$  BMDCs with  $B6.I18r1^{-/-}$  NK cells (Figure 4E). IL-12 was also required for  $IFN\gamma$  production in L1S+LPS-stimulated co-cultures of  $B6.I18^{-/-}$  BMDC and B6 NK cells because antibody blockade of IL-12p70 or IL-12R prevented  $IFN\gamma$  production (Figure 4F). However, blockade of IL-12/IL-12R did not prevent similarly treated NK cells from secreting IL-10 (Figure 4G). Thus, IL-12 selectively co-stimulates  $IFN\gamma$ , but not IL-10, production by NK cells. This result demonstrated an additional distinction in the regulation of NK cell  $IFN\gamma$  and IL-10 secretion but was somewhat surprising given prior results that IL-12 and STAT4 signaling induces IL-10 production by cultured NK cells and NK cells from parasite-infected mice (Grant et al., 2008; Perona-Wright et al., 2009). We thus

NK cell IL-10 production in response to Lm infection or L1S+LPS treatment of BMDCs requires IL-18, as shown above, we found that IL-12 stimulation readily induced IL-10 production by cultured  $B6.I18r1^{-/-}$  NK cells (Figure 4J). These results show that IL-18 signaling to NK cells is critical for their production of IL-10 during Lm infection and in response to L1S+LPS stimulation of BMDCs. They further show that NK cell  $IFN\gamma$  and IL-10 secretion are differentially dependent on IL-12 and STAT4.

### Batf3 Expression Licenses DC IL-18 Production in Response to L1S+LPS

To determine whether, like BMDCs, primary DCs respond to L1S+LPS stimulation, positive selection with magnetic beads was used to enrich  $CD11c^+$  cells from spleens of B6 mice

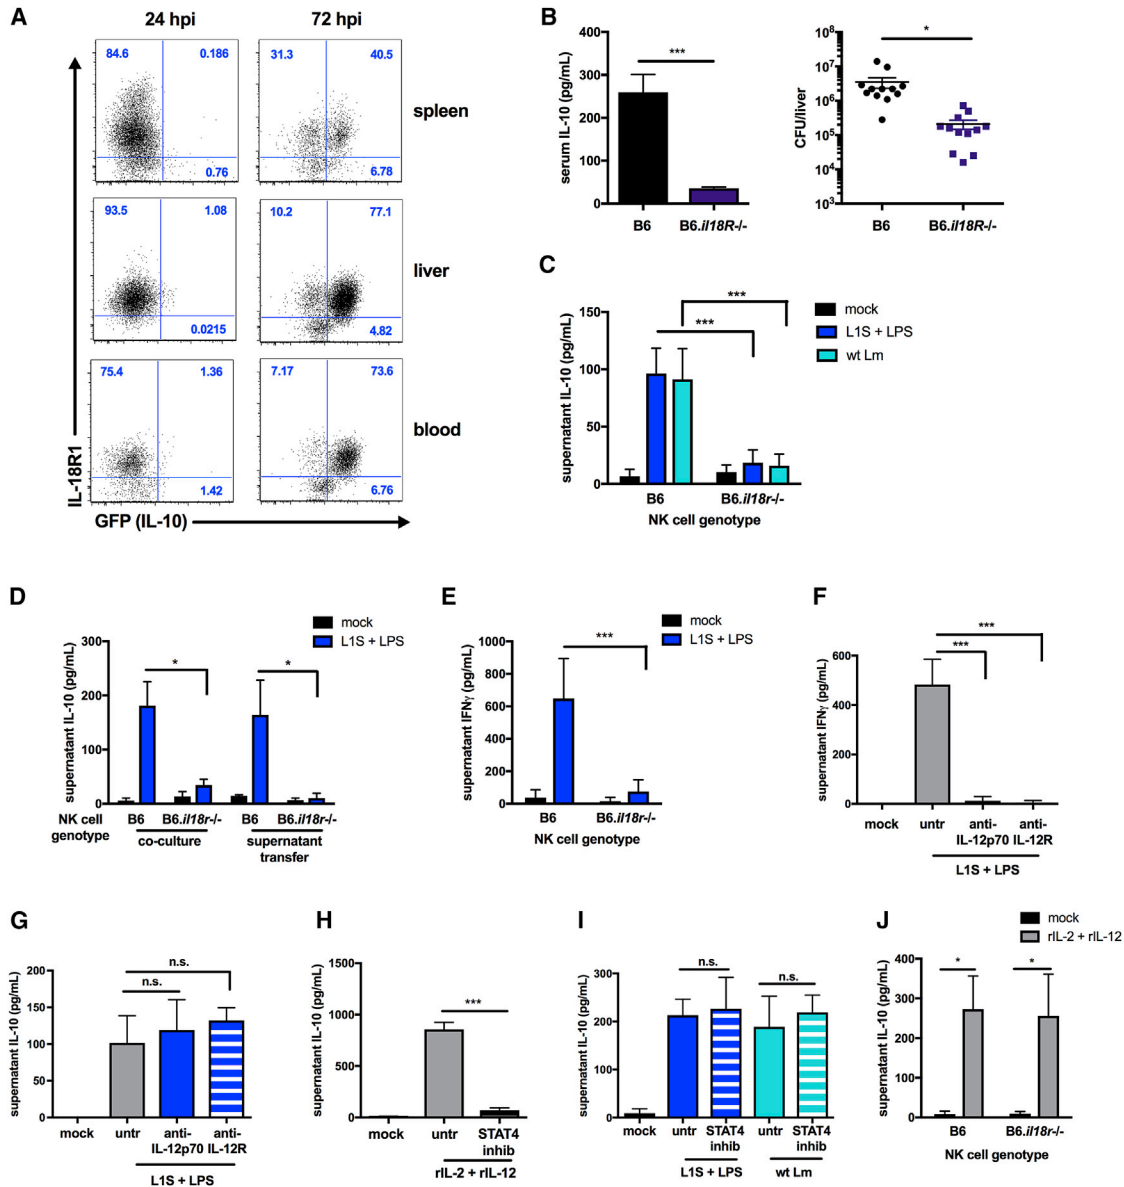

**Figure 4. IL-18 Acts on NK Cells to License IL-10 Secretion Independent of IL-12/STAT4 Signaling**

(A) Percentage of NK1.1+CD3<sup>-</sup> cells from the spleen, liver, and blood positive for IL-18R1 expression from IL-10 GFP<sup>+</sup> and IL-10 GFP<sup>-</sup> populations at the indicated time points with 10<sup>4</sup> Lm i.v. in IL-10 GFP reporter mice (representative of n = 3 experiments with 3–5 mice per group).

(B) Serum IL-10 and Lm burdens per liver from B6 or B6.II18R<sup>-/-</sup> mice sacrificed 72 hpi (n = 3 independent experiments pooled with 3–5 mice per group).

(C) Supernatant IL-10 detected in B6 or B6.II18R<sup>-/-</sup> NK cells 72 hr after co-culture with B6.II10<sup>-/-</sup> BMDCs stimulated with L1S+LPS or infected with Lm.

(D) Supernatant IL-10 detected from B6 or B6.II18R<sup>-/-</sup> NK cells 72 hr after co-culture with or exposure to filtered supernatants from B6.II10<sup>-/-</sup> BMDCs stimulated with L1S+LPS for 1 hr.

(E) Supernatant IFN $\gamma$  detected in B6 or B6.II18R<sup>-/-</sup> NK cells 24 hr after co-culture with B6 BMDCs stimulated with L1S+LPS.

(F and G) Supernatant cytokines detected 24 hr (IFN $\gamma$ , F) or 72 hr (IL-10, G) in NK cells in co-culture with B6.II10<sup>-/-</sup> BMDCs stimulated with L1S+LPS with or without 1  $\mu$ g/mL anti-IL-12p70 or 50  $\mu$ g/mL anti-IL-12R added with NK cells to co-cultures.

(H) Supernatant IL-10 detected 72 hr after stimulation of NK cells with 50 pg/mL rIL-12 + 50 pg/mL rIL-2 with or without 80  $\mu$ M STAT4 inhibitor lisofylline.

(I) Supernatant IL-10 detected at 72 hr from NK cells in co-culture with B6.II10<sup>-/-</sup> BMDCs stimulated with L1S+LPS or infected with Lm with or without 80  $\mu$ M STAT4 inhibitor lisofylline added with NK cells to co-cultures.

(J) Supernatant IL-10 detected in B6 or B6.II18R<sup>-/-</sup> NK cells 72 hr post-stimulation with 50 pg/mL rIL-12 + 50 pg/mL rIL-2 (n = 3 independent experiments pooled for *in vitro* experiments).

Data are displayed as mean  $\pm$  SEM; \*p < 0.05 and \*\*\*p < 0.001 as measured by t test.

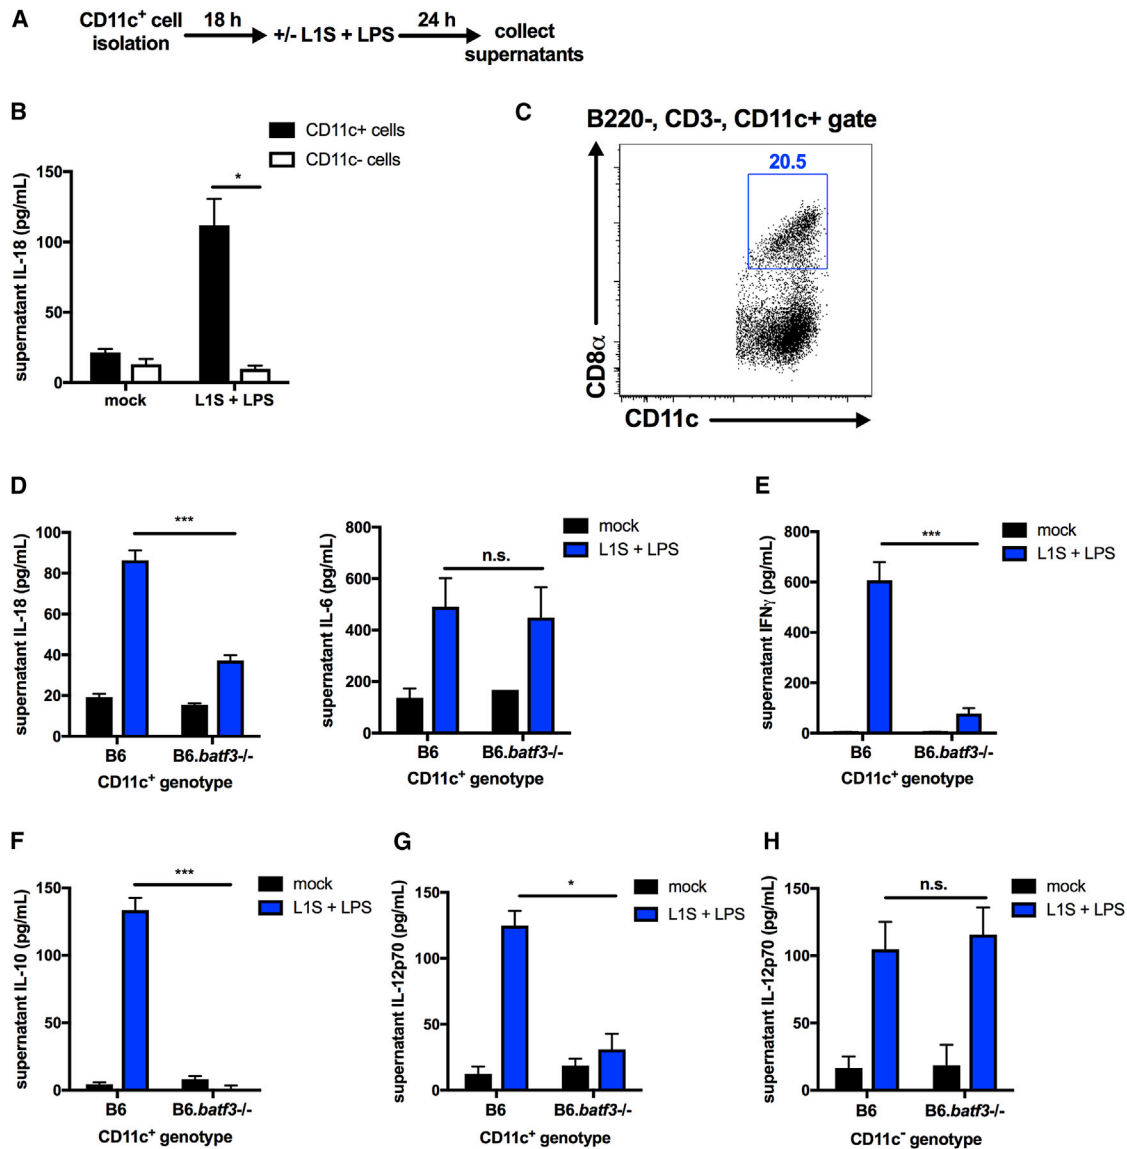

**Figure 5. Batf3 Expression Licenses DC IL-18 Production in Response to L1S+LPS**

(A) Schematic of CD11c<sup>+</sup> cell stimulation *in vitro*.

(B) Supernatant IL-18 detected from CD11c<sup>+/−</sup> cells 24 hr post-stimulation with L1S+LPS (n = 3 independent experiments pooled).

(C) CD8 $\alpha$ <sup>+</sup>CD11c<sup>+</sup> cells detected by flow cytometry from the B220<sup>−</sup>CD3<sup>−</sup>CD11c<sup>+</sup> gate of purified CD11c<sup>+</sup> cells (representative of n = 3 experiments).

(D) Supernatant IL-18 (left) and IL-6 (right) detected in CD11c<sup>+</sup> cells purified from B6 or B6.Batf3<sup>−/−</sup> mice 24 hr after stimulation with L1S+LPS.

(E and F) Supernatant cytokines detected following co-culture of NK cells with B6 or B6.Batf3<sup>−/−</sup> CD11c<sup>+</sup> cells 24 hr after stimulation with L1S+LPS (IFN $\gamma$ , E) or 72 hr following NK cell exposure to filtered supernatants from B6 or B6.Batf3<sup>−/−</sup> CD11c<sup>+</sup> cells stimulated with L1S+LPS for 1 hr (IL-10, F).

(G and H) Supernatant IL-12p70 detected 24 hr after stimulation of B6 or B6.Batf3<sup>−/−</sup> CD11c<sup>+</sup> (G) or CD11c<sup>−</sup> (H) cells with L1S+LPS (n = 3 independent experiments pooled for *in vitro* experiments).

Data are displayed as mean  $\pm$  SEM; \*p < 0.05 and \*\*\*p < 0.001 as measured by t test.

(Figure 5A). When isolated CD11c<sup>+</sup> cells and CD11c-depleted splenocytes were assayed for responsiveness to L1S+LPS, we observed that only splenic CD11c<sup>+</sup> cells secreted IL-18 (Figure 5B). Approximately 20% of the CD11c<sup>+</sup> cells isolated in this manner co-stained positively for CD8 $\alpha$  (Figure 5C). The transcription factor Batf3 promotes development of the CD8 $\alpha$ <sup>+</sup> DC population (Hildner et al., 2008); thus, we asked how loss of Batf3 expression affects the responsiveness of CD11c<sup>+</sup> spleno-

cytes to L1S+LPS stimulation. Following a 24-hr stimulation, the quantity of IL-18 released from B6.Batf3<sup>−/−</sup> CD11c<sup>+</sup> splenocytes was found to be significantly less than that from control B6 cells despite comparable secretion of LPS-induced IL-6 (Figure 5D). These data indicate that Batf3-deficient cells selectively fail to release IL-18 in response to L1S stimulation. Consistent with the absence of IL-18, B6 NK cells failed to secrete IFN $\gamma$  or IL-10 when co-cultured or treated with supernatants from



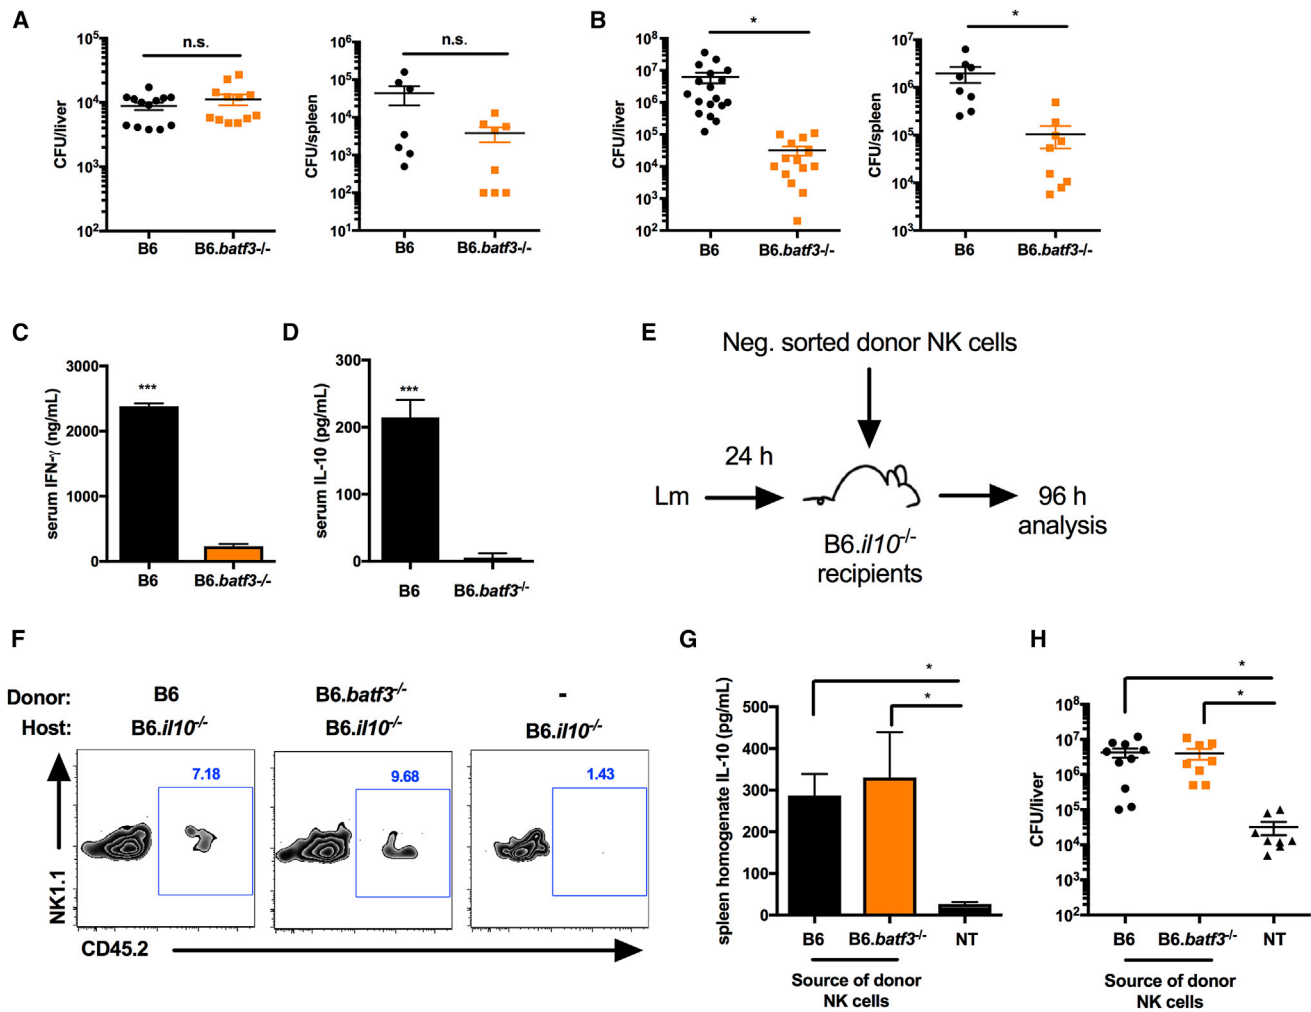

**Figure 6. Batf3 Expression Promotes Bacterial Expansion during Systemic Lm Infection by Licensing NK Cell IL-10 Secretion**

(A and B) Lm burdens per organ of B6 or B6.*Batf3*<sup>-/-</sup> mice harvested at 24 hpi (A) or 72 hpi (B) with 10<sup>4</sup> Lm i.v. (C and D) Serum cytokines detected from B6 or B6.*Batf3*<sup>-/-</sup> mice harvested at 24 hpi (IFN $\gamma$ , C) or 72 hpi (IL-10, D). (E) Schematic of NK cell adoptive transfer. (F) CD3<sup>+</sup> NK1.1<sup>+</sup> CD45.2<sup>+</sup> donor cells (or [-] = no transfer) detected by flow cytometry from the spleens of B6.*Il10*<sup>-/-</sup> recipient mice at 96 hpi. (G and H) Total spleen homogenate IL-10 (G) and Lm burdens per livers (H) detected in B6.*Il10*<sup>-/-</sup> recipients at 96 hpi. NT, no transfer. Data were pooled from n = 3 independent experiments with 3–5 mice per group. Data are displayed as mean  $\pm$  SEM; \*p < 0.05 and \*\*\*p < 0.001 as measured by t test (B–D) or ANOVA (G and H). See also Figure S5.

L1S+LPS-stimulated B6.*Batf3*<sup>-/-</sup> CD11c<sup>+</sup> cells (Figures 5E and 5F). Some splenic CD11c<sup>+</sup> cells purified from *Batf3*<sup>-/-</sup> spleens remained positive for CD8 $\alpha$ , as reported by others (Figure S4A; Edelson et al., 2011). Furthermore, *Il18* and *nlrp3* transcript abundance and pro-IL-18 and NLRP3 protein amounts were similar in purified CD11c<sup>+</sup> splenocytes from B6 and B6.*Batf3*<sup>-/-</sup> mice, indicating a defect in IL-18 secretion rather than expression (Figures S4B and S4C). *Batf3* expression was also required for licensing of IL-12 production by CD11c<sup>+</sup>, but not CD11c<sup>-</sup>, spleen cells (Figures 5G and 5H). These data argue that *Batf3* expression is not essential for responsiveness to LPS or for expression of NLRP3 or IL-18, but selectively licenses the ability of CD11c<sup>+</sup> splenocytes to release soluble factors, including IL-18, that are essential for NK cell IFN $\gamma$  and IL-10 production.

### Batf3 Expression Promotes Bacterial Expansion during Systemic Lm Infection by Licensing NK Cell IL-10 Secretion

To further evaluate the effect of *Batf3* on NK cell activity *in vivo*, B6 and B6.*Batf3*<sup>-/-</sup> mice were infected i.v. with 10<sup>4</sup> Lm. Equivalent Lm burdens were recovered from tissues of the infected mice at 24 hpi (Figure 6A). However, significantly reduced Lm burdens were recovered from the spleens and livers of B6.*Batf3*<sup>-/-</sup> mice at 72 hpi (Figure 6B). Indeed, Lm burdens increased  $\sim$ 1,000-fold in B6 mice between 24 and 72 hpi, whereas those in B6.*Batf3*<sup>-/-</sup> mice remained unchanged. These results suggest that bacteria seed target organs normally but that, in the absence of *Batf3*, their survival and/or growth is subsequently impaired. Similar phenotypes are seen

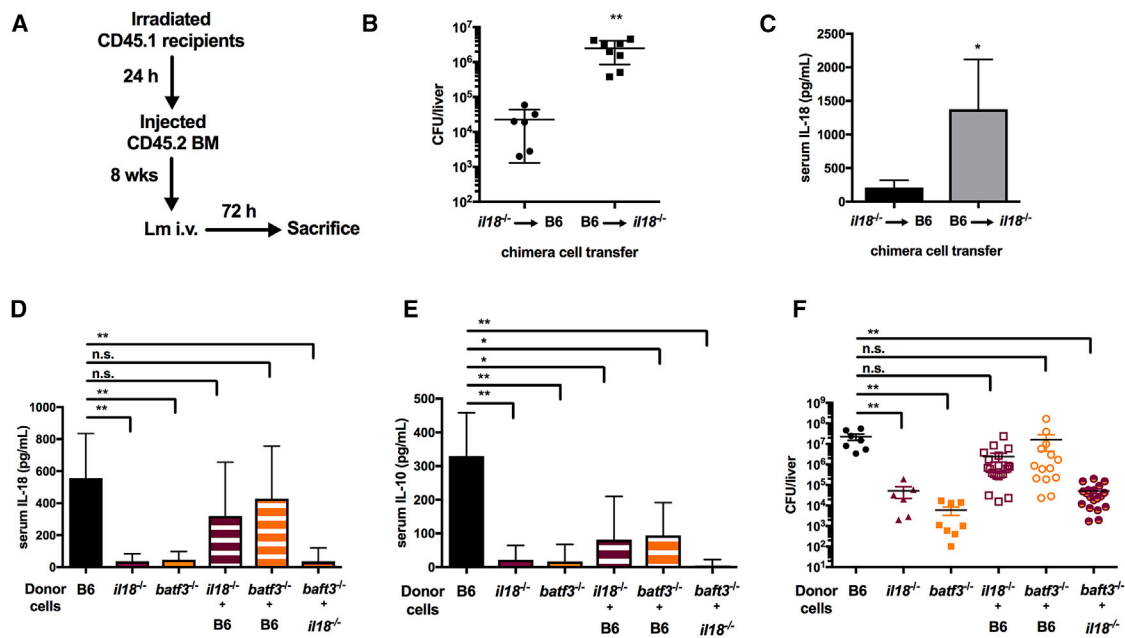

**Figure 7. Batf3-Dependent Cells Are a Vital Source of IL-18 that Regulates NK Cell IL-10 Responses during Lm Infection**

(A) Schematic of the bone marrow (BM) chimera experiment.

(B and C) Bacterial burdens per liver (B) and serum IL-18 (C) in lethally irradiated B6 versus B6.*Il18*<sup>-/-</sup> recipients of B6.*Il18*<sup>-/-</sup> or B6 BM, respectively, harvested at 72 hpi with 10<sup>4</sup> Lm i.v. (n = 2 independent experiments with 3–5 mice per group).

(D and E) Serum IL-18 (D) and IL-10 (E) detected in lethally irradiated BM recipients at 72 hpi.

(F) Lm burdens per the livers of BM recipients at 72 hpi (data pooled from n = 2 independent experiments with 3–5 mice per group, repeated a third time with similar results).

Data are displayed as mean ± SEM; \*p < 0.05 and \*\*p < 0.01 as measured by t test (B and C) or ANOVA (D–F).

in *Nlrp3*<sup>-/-</sup>, *Il18*<sup>-/-</sup>, and *Il18r*<sup>-/-</sup> mice (above) and in mice depleted of NK cells prior to infection (Clark et al., 2016), all of which demonstrate loss of NK cell activation. Consistent with a loss of NK cell activity in infected B6.*Batf3*<sup>-/-</sup> mice, serum IFN $\gamma$  was significantly lower at 24 hpi (Figure 6C), and little or no serum IL-10 was detected at 72 hpi (Figure 6D). These results show that *Batf3* expression is critical for *in vivo* activation of NK cells, contributing to early bacterial expansion during systemic Lm infection.

We considered two possible explanations for the defective NK cell response in the infected B6.*Nlrp3*<sup>-/-</sup> mice. Either NK cells failed to develop properly in a host lacking *Batf3*, or, as suggested by our cell culture experiments above, *Batf3* expression licensed the production of IL-18 and/or other factors critical for stimulation of NK cell activity during Lm infection. To distinguish between these possibilities, we first asked whether B6.*Batf3*<sup>-/-</sup> NK cells were capable of responding to Lm infection and producing IL-10 during systemic infection. Here naive splenic NK cells from CD45.2<sup>+</sup> B6 or B6.*Batf3*<sup>-/-</sup> mice were purified and transferred into CD45.1<sup>+</sup> B6.*Il10*<sup>-/-</sup> recipients 24 hpi (Figure 6E). In mice given CD45.2<sup>+</sup> NK cells, a small population of the donor cells was detected upon harvest at 96 hpi (Figure 6F). Further, elevated IL-10 was detected in spleen homogenates from B6.*Il10*<sup>-/-</sup> mice that received either type of donor NK cell (Figure 6G). This NK cell-dependent IL-10 production was further confirmed to increase Lm burdens in the B6.*Il10*<sup>-/-</sup> recipients (Figure 6H). As we showed previously (Clark et al., 2016), NK

cell IL-10 production and increased Lm burdens were associated with reduced accumulation of inflammatory myeloid cells in Lm-infected spleens. Similarly, we observed increased recruitment of inflammatory myeloid cells to the spleens of IL-10-deficient mice at 96 hpi with 10<sup>4</sup> Lm compared with IL-10-deficient recipients of donor WT B6 or B6.*Batf3*<sup>-/-</sup> NK cells (Figure S5). These data argue that NK cells develop normally in B6.*Batf3*<sup>-/-</sup> mice and that *Batf3* expression by a non-NK cell population is required to activate NK cell production of IL-10, which suppresses inflammatory myeloid cell recruitment and increases Lm burdens.

### Batf3-Dependent Cells Are a Vital Source of IL-18 that Regulates NK Cell IL-10 Responses during Lm Infection

The data above indicated that *Batf3* expression by CD11c<sup>+</sup> cells regulates their production of IL-12 and IL-18 and their ability to stimulate NK cell activity. *Batf3* and IL-18 were likewise required for NK cell activation during systemic infection. However, because IL-18 can be produced by multiple cell types, it remained unclear whether *Batf3*<sup>+</sup> cells were an essential source of IL-18 production during systemic Lm infection. To evaluate this, we constructed and infected a series of bone marrow chimeras (Figure 7A). Lethally irradiated B6.*Ptprc*<sup>a</sup> (CD45.1) mice were reconstituted with bone marrow (BM) from WT or mutant B6 mice. Initially, reciprocal chimeras were constructed in which irradiated B6 or B6.*Il18*<sup>-/-</sup> mice were reconstituted with BM from the opposite strain. These chimeric animals were

infected with  $10^4$  Lm and analyzed at 72 hpi. At the time of harvest, mice in which only hematopoietic cells could produce IL-18 supported  $\sim 100$  times higher bacterial burdens than mice where only non-hematopoietic cells could produce IL-18 (Figure 7B). Infected mice whose hematopoietic cells were  $Il18^{-/-}$  also failed to accumulate serum IL-18 (Figure 7C). These results showed that hematopoietic cells are the major source of detectable IL-18 during systemic Lm infection and that their IL-18 production is required for increasing host susceptibility.

Subsequently, irradiated B6.*Ptprc*<sup>a</sup> mice reconstituted with B6.*Il18*<sup>-/-</sup> BM were compared directly with those reconstituted with WT B6 BM, B6.*Batf3*<sup>-/-</sup> BM, or a mixture of BM from each source. Following Lm infection, mice reconstituted with donor BM from WT mice produced ample IL-18 (Figure 7D). By comparison, little or no IL-18 was observed in sera from infected mice reconstituted individually with B6.*Il18*<sup>-/-</sup> or B6.*Batf3*<sup>-/-</sup> BM. These data are consistent with the results above and further indicate that hematopoietic cells require *Batf3* to license their production of systemic IL-18. Strikingly, mice reconstituted with 1:1 mixtures of donor BM from B6.*Il18*<sup>-/-</sup> and B6.*Batf3*<sup>-/-</sup> mice (in which *batf3*-dependent cells develop but are the only cell type that cannot produce IL-18) also failed to produce substantial IL-18 in response to the 72-hr Lm infection (Figure 7D). By comparison, when WT hematopoietic cells were present, serum IL-18 was present at WT concentrations regardless of the presence of B6.*Il18*<sup>-/-</sup> or B6.*Batf3*<sup>-/-</sup> cells. This result indicated that cells lacking *Batf3* or IL-18 did not suppress IL-18 production by neighboring cells. Further, it showed that an  $\sim 50\%$  reduction in the population of IL-18-producing hematopoietic cells did not significantly reduce serum IL-18 during the infection. Consistent with our data above implicating IL-18 as a key regulator of NK cell IL-10 production during Lm infection, we further found that serum IL-10 concentrations paralleled those of IL-18 in the various chimeric animals (Figure 7E). The amounts of IL-18 and IL-10 detected in the sera of chimeric animals were also found to correlate with differences in Lm burdens (Figure 7D). Hence, we conclude that hematopoietic cells are a critical source the IL-18 required to license NK cell IL-10 secretion, increasing bacterial burdens during systemic Lm infection, and that cell-intrinsic expression of *Batf3* is vital for the development and/or activity of IL-18-secreting cells that respond to Lm.

## DISCUSSION

IL-10 production potentially affects inflammation, infection, cancer, and autoimmune diseases. Lm is one of several pathogens known to benefit from early host IL-10 production, and we recently showed that NK cells are a key source of this IL-10 (Clark et al., 2016). We now identify a critical host pathway required for this bacterially induced NK cell IL-10 secretion. Our data show that Lm infection or stimulation with a recombinant fragment of the Lm p60 protein (L1S) induces release of IL-18 from DCs. IL-18 acts directly on NK cell IL-18R in conjunction with a currently unknown second factor to promote IL-10 secretion. We further identify *Batf3* and NLRP3 as essential regulators of this NK cell-stimulatory IL-18. These findings suggest that Lm targets a *Batf3*-dependent cell population to induce NLRP3-dependent IL-18 secretion, which promotes an

immune-suppressive response mediated by NK cell IL-10 production.

Our studies reveal that host NLRP3 plays a key role in the regulation of the IL-18 production critical for NK cell IL-10 secretion and increased susceptibility during Lm infection. NLRP3 is a sensor component of a multi-protein complex termed the inflammasome. Inflammasomes regulate the proteolytic cleavage of pro-IL-18 and release of the mature biologically active protein, although inflammasome-independent mechanisms can also contribute to IL-18 processing (Broz and Dixit, 2016; Dinarello et al., 2013). Although crucial for accumulation of serum IL-18 and IL-10 at 72 hpi, NLRP3 was only partly required for serum IFN $\gamma$  at 24 hpi. However, IL-18 was required for both responses. This discrepancy suggests that there is NLRP3-independent IL-18 production early after Lm infection. Indeed, the Lm proteins LLO and flagellin and bacterial DNA have previously been implicated in activation of NLRP3, NLRC4, and AIM2 inflammasomes in cultured macrophages (Meixenberger et al., 2010; Warren et al., 2008; Wu et al., 2010). The increased resistance of *Nlrp3*<sup>-/-</sup> mice was somewhat surprising given that they are more susceptible to infections by *Citrobacter rodentium* and group B *Streptococcus* (Costa et al., 2012; Liu et al., 2012). Evasion of NLRP3 or other inflammasome activation is also thought to be a pathogenic strategy for *Streptococcus pneumoniae*, *Yersinia*, *Francisella tularensis*, and *Mycobacterium tuberculosis* (Brodsky et al., 2010; Huang et al., 2010; Master et al., 2008; Witzentrath et al., 2011). These data and the fact that inflammasome activity promotes clearance of certain non-pathogenic environmental bacteria such as *Chromobacterium violaceum* has led to the proposition that non-pathogens activate the inflammasome, whereas the success of true pathogens relies on evasion or suppression of inflammasome activity (Maltez et al., 2015). However, this model fails to incorporate the fact that certain pathogens have evolved strategies to exploit inflammasome activation. For example, inflammasome activity was previously shown to impair bacterial clearance and host survival in a *Pseudomonas aeruginosa* infection model (Cohen and Prince, 2013). Further, *Mycobacterium marinum* and influenza virus encode proteins that promote NLRP3 activation, increasing replication of both pathogens in animal infection models (Carlsson et al., 2010; Tate et al., 2016). We show that Lm also exploits NLRP3 inflammasome activation and indicate that the mechanism by which this likely benefits the pathogen is through release of IL-18 to promote production of anti-inflammatory IL-10.

IL-18 had not been previously implicated in the regulation of NK cell IL-10 production. This cytokine was originally identified as an "IFN $\gamma$ -inducing factor" that promotes IFN $\gamma$  production during sepsis (Okamura et al., 1995). However, IL-18 alone induces little or no IFN $\gamma$ . IL-18 instead acts synergistically with IL-12 to promote IFN $\gamma$  secretion by NK and T lymphocytes in the context of Lm and other infections (Berg et al., 2002; Humann and Lenz, 2010; Kupz et al., 2014; Soudja et al., 2012). We found that NK cell IL-10 production elicited in response to L1S or Lm-stimulated DCs was dependent on DC production of IL-18 and NK cell expression of IL-18R1. However, IL-18 alone failed to elicit this IL-10 production in the absence of other DC factors. These findings argue that IL-18 also acts in synergy with a second Lm-induced DC factor to promote NK cell IL-10 secretion.

Prior studies have shown that IL-12-induced STAT4 signaling alone can promote IL-10 secretion from human and mouse NK cells (Grant et al., 2008; Mehrotra et al., 1998). However, our data showed that IL-18 was not required for this IL-12 induced IL-10 secretion and that blockade of IL-12 or STAT4 did not inhibit NK cell IL-10 production induced by Lm/L1S-stimulated DC. Hence, there exist at least two distinct pathways that can drive NK cell production of IL-10. Further characterization of the unknown second factor that synergizes with IL-18 will be an important goal of future studies.

One previous report suggested that *Il18*<sup>-/-</sup> mice resist systemic Lm infection, consistent with our finding that IL-18 increases host susceptibility (Lochner et al., 2008). Murine infections with *Pseudomonas aeruginosa* and *Ehrlichia* also revealed detrimental roles for IL-18 (Ghose et al., 2011; Schultz et al., 2003), and mice lacking IL-18 have increased susceptibility to *Mycobacterium tuberculosis* and *Helicobacter* infections (Hitzler et al., 2012; Schneider et al., 2010). Given our findings here, we speculate that, in some or all of these cases, IL-18 may promote susceptibility through the licensing of regulatory NK cell activity. Conversely, IL-18 has been suggested in at least one prior study to play a protective role during Lm infection. In that study, mice were treated with recombinant IL-18 at 24, 48, and 72 hpi. This was found to reduce Lm bacterial burdens upon harvest at 4 days post-infection (dpi) (Maltez et al., 2015). We propose that, in this context, inflammasome activation and IL-18 production might have exerted positive effects on host resistance given its earlier timing and distinct conditions. Specifically, systemic IL-18 early during Lm infection (24 hpi) occurs in the presence of few inflammatory cells and low bacterial burdens. This IL-18 normally synergizes with IL-12 and other factors to stimulate a wave of NK and memory T cell activation and IFN $\gamma$  production. Supplementation of this early response with recombinant IL-18 might thus be expected to further boost resistance. The higher concentrations of endogenous IL-18 seen at later times after infection (72 hpi) are instead normally associated with a high number of recruited inflammatory cells and higher bacterial burdens. In this context, endogenous IL-18 production primarily synergizes with a non-IL-12 factor to trigger IL-10 production and suppress inflammation.

Several prior reports have suggested a vital role for DCs in promoting Lm infection. Depletion of CD11c<sup>+</sup> cells in CD11c-diphtheria toxin receptor (DTR) mice reduced splenic Lm burdens during systemic infection (Neuenhahn et al., 2006). CD8 $\alpha$ <sup>+</sup> DCs were identified as a cell population that is infected with Lm at early time points post-infection (Neuenhahn et al., 2006). Batf3-deficient mice were later shown to have reduced numbers of CD8 $\alpha$ <sup>+</sup> and CD103<sup>+</sup> DCs and to support reduced Lm burdens (Edelson et al., 2011). However, it has remained unclear precisely how Batf3 expression might increase host susceptibility to Lm. Our studies here indicate that Batf3 plays a vital role in regulating the production of IL-18 in response to Lm/L1S. Despite there being many potential sources of IL-18 production *in vivo*, our mixed chimera experiments showed that high concentrations of serum IL-18 at 72h after Lm infection are only observed when Batf3 and IL-18 are co-expressed by the same cell. The presence of Batf3<sup>+</sup> cells *in vivo* failed to increase host susceptibility when these cells could not produce IL-18 (even when all other cell types could

produce IL-18). Similarly, in response to L1S treatment, we observed little IL-18 secretion and NK cell activation by CD11c<sup>+</sup> cells purified from spleens of *Batf3*<sup>-/-</sup> mice. These data together argue that Batf3 does not increase bacterial burdens during Lm infection solely by providing a cellular niche for bacterial replication. Rather, Batf3<sup>+</sup> cells appear to be a vital source of IL-18 production during *in vivo* Lm infection. We do not find a requirement for Batf3 in transcription of *Nlrp3* and *Il18* or expression of NLRP3 and IL-18 proteins. Indeed, other splenic DC populations similarly expressed both of these factors regardless of *Batf3* expression. Instead, we propose that *Batf3* expression and/or an abundance of CD8 $\alpha$ <sup>+</sup> DCs may increase host sensitivity to the Lm-derived p60/L1S protein. Our *in vitro* data using purified splenic CD11c<sup>+</sup> populations are consistent with the model that batf3 directly regulates the responsiveness of DCs to L1S. However, we cannot, at this point, exclude the alternative possibility that, during Lm infection, the presence of IL-18-producing Batf3<sup>+</sup> DCs might initiate IL-18 production that also requires other cell types. In this light, a previous study showed that, in cultured Ly6C<sup>+</sup> monocytes activate Lm memory CD8<sup>+</sup> T cells in an IL-18R-dependent manner (Soudja et al., 2012). Nevertheless, our work shows a crucial importance for IL-18 production by Batf3-dependent cell population(s) in the induction of NK cell IL-10 secretion and the suppressive effects of this IL-10 on host resistance. As such, our findings further provide a revised mechanistic paradigm to account for the previously reported deleterious role of Batf3 and CD8 $\alpha$ <sup>+</sup> DCs in the early immune response to Lm.

In summary, our work has identified several critical components of a pathway exploited by Lm to elicit an immune-suppressive NK cell response. Although there are currently immunotherapy approaches focused on the improvement of NK cell responsiveness to tumors (Lowry and Zehring, 2017), strategies to dampen NK cell anti-inflammatory responses remain unexplored. Our findings reveal several possible targets for interventions to limit NK cell IL-10 production during Lm and potentially other bacterial infections. Because NK cell regulatory activity has broad implications for host immunity, further study of the mechanisms contributing to this process may reveal new targets for therapy of infectious and inflammatory diseases.

## EXPERIMENTAL PROCEDURES

### Animals

Adult male and female mice were used at 8–12 weeks of age. C57BL/6J (B6), B6.tiger (IL-10 GFP reporter), B6.*Il10*<sup>-/-</sup>, B6.*Ptprc*<sup>a</sup> (CD45.1), B6.*Il18r*<sup>-/-</sup>, B6.*Il18*<sup>-/-</sup>, B6.*Nlrp3*<sup>-/-</sup>, and B6.*Batf3*<sup>-/-</sup> mice were purchased from The Jackson Laboratory. Mice were maintained in the University of Colorado Office of Laboratory Animal Resources.

### Infections

WT Lm, strain 10403s) or  $\Delta$ p60 Lm (Lenz et al., 2003) were thawed from frozen stocks and diluted in tryptic soy broth (MP Biomedicals) with streptomycin (50  $\mu$ g/mL) for growth to log phase. Log phase bacteria were diluted in PBS and injected i.v. in the lateral tail vein. Mice received a single sublethal dose of 10<sup>4</sup> colony-forming units (CFUs). For CFU determinations, organs were harvested in 0.02% Nonidet P-40 and homogenized for 1 min with a tissue homogenizer (IKA Works). Serial dilutions were plated on trypticase soy broth (TSB) agar plates with streptomycin (50  $\mu$ g/mL) and grown overnight at 37°C.

### Generation of Chimeric Mice

Mice received a dose of 500 rads for irradiation. For BM cell transfers, each mouse received  $10^6$  BM cells delivered i.v. in 200  $\mu$ L. Mice were allowed to reconstitute for 5–8 weeks before infection with  $10^4$  Lm i.v. Reconstitution of the hematopoietic system by donor-derived cells was in all cases >80%, as determined by staining for CD45.1/2 and flow cytometric analysis.

### Cell Isolation and Stimulations

NK cells were purified by negative selection from spleens of naive mice using the EasySep NK Cell Enrichment Kit (19855, STEMCELL Technologies). NK cell negative sort isolations were >80% NK1.1+CD3– cells. CD11c+ cells were sorted by positive selection using the EasySep Mouse CD11c Positive Selection Kit (18758, STEMCELL Technologies). CD11c+ sort isolations were >90% CD11c+ cells. CD11c+ cells were plated 18 hr prior to stimulation.

For co-culture experiments, BMDCs were cultured and infected with Lm or stimulated with 10 ng/mL LPS (L8274, Sigma-Aldrich, St. Louis, MO) and 30  $\mu$ g/mL recombinant L1S protein as previously described (Humann and Lenz, 2010; Schmidt et al., 2011). For transwell experiments, NK cells were separated from BMDCs by 0.4  $\mu$ M membranes. For supernatant transfer experiments, BMDCs were cultured or CD11c+ cells were purified, and  $3 \times 10^5$  cells were plated overnight in 24-well plates. One hr post-infection, cells were washed, and gentamycin was added at 10  $\mu$ g/mL. One hr after this, supernatants were harvested and filtered (0.22  $\mu$ M). Filtered supernatants were added to a new 24-well plate. NK cells purified as above were then added to the new plates with filtered supernatants. For L1S+LPS stimulations, cells were stimulated as above for 1 hr. Subsequently, supernatants were harvested, filtered, and added to a new 24-well plate, and then purified NK cells were added.

### Study Approval

The Animal Care and Use Committee of the University of Colorado School of Medicine (protocols 105614(05)1E and #105617(04)1E) approved these studies.

### Statistical Analysis

Prism (GraphPad) was used for graphing and statistical analysis. Statistical tests included t tests and ANOVA.  $p < 0.05$  was considered significant.

### SUPPLEMENTAL INFORMATION

Supplemental Information includes Supplemental Experimental Procedures and five figures and can be found with this article online at <https://doi.org/10.1016/j.celrep.2018.04.106>.

### ACKNOWLEDGMENTS

We thank other current and former members of the lab for critical discussion of these data. This work was funded by National Institute of Allergy and Infectious Diseases grants AI114075 (to S.E.C.), AI065638, and AI131662 (to L.L.L.).

### AUTHOR CONTRIBUTIONS

S.E.C., R.L.S., and L.L.L. conceived and designed the experiments. S.E.C., R.L.S., D.S.M., and L.L.L. performed the experiments. S.E.C. and L.L.L. wrote the paper and edited the manuscript.

### DECLARATION OF INTERESTS

The authors declare no competing interests.

Received: December 22, 2017

Revised: March 6, 2018

Accepted: April 25, 2018

Published: May 29, 2018

### REFERENCES

- Berg, R.E., Cordes, C.J., and Forman, J. (2002). Contribution of CD8+ T cells to innate immunity: IFN-gamma secretion induced by IL-12 and IL-18. *Eur. J. Immunol.* **32**, 2807–2816.
- Borg, C., Jilil, A., Laderach, D., Maruyama, K., Wakasugi, H., Charrier, S., Ryffel, B., Cambi, A., Figdor, C., Vainchenker, W., et al. (2004). NK cell activation by dendritic cells (DCs) requires the formation of a synapse leading to IL-12 polarization in DCs. *Blood* **104**, 3267–3275.
- Brodsky, I.E., Palm, N.W., Sadanand, S., Ryndak, M.B., Sutterwala, F.S., Flavell, R.A., Bliska, J.B., and Medzhitov, R. (2010). A Yersinia effector protein promotes virulence by preventing inflammasome recognition of the type III secretion system. *Cell Host Microbe* **7**, 376–387.
- Broz, P., and Dixit, V.M. (2016). Inflammasomes: mechanism of assembly, regulation and signalling. *Nat. Rev. Immunol.* **16**, 407–420.
- Carlsson, F., Kim, J., Dumitru, C., Barck, K.H., Carano, R.A.D., Sun, M., Diehl, L., and Brown, E.J. (2010). Host-detrimental role of Esx-1-mediated inflammasome activation in mycobacterial infection. *PLoS Pathog.* **6**, e1000895.
- Cella, M., Miller, H., and Song, C. (2014). Beyond NK cells: the expanding universe of innate lymphoid cells. *Front. Immunol.* **5**, 282.
- Chaix, J., Tssmer, M.S., Hoebe, K., Fuséri, N., Ryffel, B., Dalod, M., Alexopoulou, L., Beutler, B., Brossay, L., Vivier, E., and Walzer, T. (2008). Cutting edge: Priming of NK cells by IL-18. *J. Immunol.* **181**, 1627–1631.
- Clark, S.E., Filak, H.C., Guthrie, B.S., Schmidt, R.L., Jamieson, A., Merkel, P., Knight, V., Cole, C.M., Raulet, D.H., and Lenz, L.L. (2016). Bacterial Manipulation of NK Cell Regulatory Activity Increases Susceptibility to Listeria monocytogenes Infection. *PLoS Pathog.* **12**, e1005708–e1005721.
- Cohen, T.S., and Prince, A.S. (2013). Activation of inflammasome signaling mediates pathology of acute P. aeruginosa pneumonia. *J. Clin. Invest.* **123**, 1630–1637.
- Costa, A., Gupta, R., Signorino, G., Malara, A., Cardile, F., Biondo, C., Midiri, A., Galbo, R., Trieu-Cuot, P., Papasergi, S., et al. (2012). Activation of the NLRP3 inflammasome by group B streptococci. *J. Immunol.* **188**, 1953–1960.
- Cyktor, J.C., and Turner, J. (2011). Interleukin-10 and immunity against prokaryotic and eukaryotic intracellular pathogens. *Infect. Immun.* **79**, 2964–2973.
- Dinarello, C.A., Novick, D., Kim, S., and Kaplanski, G. (2013). Interleukin-18 and IL-18 binding protein. *Front. Immunol.* **4**, 289.
- Edelson, B.T., Bradstreet, T.R., Hildner, K., Carrero, J.A., Frederick, K.E., Kc, W., Belzaira, R., Aoshi, T., Schreiber, R.D., Miller, M.J., et al. (2011). CD8 $\alpha$ (+) dendritic cells are an obligate cellular entry point for productive infection by Listeria monocytogenes. *Immunity* **35**, 236–248.
- Fehniger, T.A., Shah, M.H., Turner, M.J., VanDeusen, J.B., Whitman, S.P., Cooper, M.A., Suzuki, K., Wechsler, M., Goodsaid, F., and Caligiuri, M.A. (1999). Differential cytokine and chemokine gene expression by human NK cells following activation with IL-18 or IL-15 in combination with IL-12: implications for the innate immune response. *J. Immunol.* **162**, 4511–4520.
- Ghose, P., Ali, A.Q., Fang, R., Forbes, D., Ballard, B., and Ismail, N. (2011). The interaction between IL-18 and IL-18 receptor limits the magnitude of protective immunity and enhances pathogenic responses following infection with intracellular bacteria. *J. Immunol.* **187**, 1333–1346.
- Grant, L.R., Yao, Z.-J., Hedrich, C.M., Wang, F., Moorthy, A., Wilson, K., Ranatunga, D., and Bream, J.H. (2008). Stat4-dependent, T-bet-independent regulation of IL-10 in NK cells. *Genes Immun.* **9**, 316–327.
- Hagar, J.A., and Miao, E.A. (2014). Detection of cytosolic bacteria by inflammatory caspases. *Curr. Opin. Microbiol.* **17**, 61–66.
- Hildner, K., Edelson, B.T., Purtha, W.E., Diamond, M., Matsushita, H., Kohyama, M., Calderon, B., Schraml, B.U., Unanue, E.R., Diamond, M.S., et al. (2008). Batf3 deficiency reveals a critical role for CD8 $\alpha$ + dendritic cells in cytotoxic T cell immunity. *Science* **322**, 1097–1100.
- Hitzler, I., Sayi, A., Kohler, E., Engler, D.B., Koch, K.N., Hardt, W.D., and Müller, A. (2012). Caspase-1 has both proinflammatory and regulatory properties in Helicobacter infections, which are differentially mediated by its substrates IL-1 $\beta$  and IL-18. *J. Immunol.* **188**, 3594–3602.

- Hof, H. (2003). History and epidemiology of listeriosis. *FEMS Immunol. Med. Microbiol.* *35*, 199–202.
- Huang, M.T.H., Mortensen, B.L., Taxman, D.J., Craven, R.R., Taft-Benz, S., Kijek, T.M., Fuller, J.R., Davis, B.K., Allen, I.C., Brickey, W.J., et al. (2010). Deletion of *ripA* alleviates suppression of the inflammasome and MAPK by *Francisella tularensis*. *J. Immunol.* *185*, 5476–5485.
- Humann, J., and Lenz, L.L. (2010). Activation of naive NK cells in response to *Listeria monocytogenes* requires IL-18 and contact with infected dendritic cells. *J. Immunol.* *184*, 5172–5178.
- Humann, J., Bjordahl, R., Andreassen, K., and Lenz, L.L. (2007). Expression of the p60 autolysin enhances NK cell activation and is required for *Listeria monocytogenes* expansion in IFN- $\gamma$ -responsive mice. *J. Immunol.* *178*, 2407–2414.
- Kamanaka, M., Kim, S.T., Wan, Y.Y., Sutterwala, F.S., Lara-Tejero, M., Galán, J.E., Harhaj, E., and Flavell, R.A. (2006). Expression of interleukin-10 in intestinal lymphocytes detected by an interleukin-10 reporter knockin tiger mouse. *Immunity* *25*, 941–952.
- Kang, S.-J., Liang, H.-E., Reizis, B., and Locksley, R.M. (2008). Regulation of hierarchical clustering and activation of innate immune cells by dendritic cells. *Immunity* *29*, 819–833.
- Kerr, A.R., Kirkham, L.A.S., Kadioglu, A., Andrew, P.W., Garside, P., Thompson, H., and Mitchell, T.J. (2005). Identification of a detrimental role for NK cells in pneumococcal pneumonia and sepsis in immunocompromised hosts. *Microbes Infect.* *7*, 845–852.
- Kim, S., Bauernfeind, F., Ablasser, A., Hartmann, G., Fitzgerald, K.A., Latz, E., and Hornung, V. (2010). *Listeria monocytogenes* is sensed by the NLRP3 and AIM2 inflammasomes. *Eur. J. Immunol.* *40*, 1545–1551.
- Knorr, D.A., Bachanova, V., Verneris, M.R., and Miller, J.S. (2014). Clinical utility of natural killer cells in cancer therapy and transplantation. *Semin. Immunol.* *26*, 161–172.
- Kupz, A., Curtiss, R., 3rd, Bedoui, S., and Strugnell, R.A. (2014). In vivo IFN- $\gamma$  secretion by NK cells in response to *Salmonella typhimurium* requires NLR4 inflammasomes. *PLoS ONE* *9*, e97418.
- Lanier, L.L. (2008). Up on the tightrope: natural killer cell activation and inhibition. *Nat. Immunol.* *9*, 495–502.
- Lenz, L.L., Mohammadi, S., Geissler, A., and Portnoy, D.A. (2003). SecA2-dependent secretion of autolytic enzymes promotes *Listeria monocytogenes* pathogenesis. *Proc. Natl. Acad. Sci. USA* *100*, 12432–12437.
- Liu, Z., Zaki, M.H., Vogel, P., Gurung, P., Finlay, B.B., Deng, W., Lamkanfi, M., and Kanneganti, T.-D. (2012). Role of inflammasomes in host defense against *Citrobacter rodentium* infection. *J. Biol. Chem.* *287*, 16955–16964.
- Lochner, M., Kastenmüller, K., Neuenhahn, M., Weighardt, H., Busch, D.H., Reindl, W., and Förster, I. (2008). Decreased susceptibility of mice to infection with *Listeria monocytogenes* in the absence of interleukin-18. *Infect. Immun.* *76*, 3881–3890.
- Lowry, L.E., and Zehring, W.A. (2017). Potentiation of Natural Killer Cells for Cancer Immunotherapy: A Review of Literature. *Front. Immunol.* *8*, 1061.
- Maltez, V.I., Tubbs, A.L., Cook, K.D., Aachoui, Y., Falcone, E.L., Holland, S.M., Whitmire, J.K., and Miao, E.A. (2015). Inflammasomes Coordinate Pyroptosis and Natural Killer Cell Cytotoxicity to Clear Infection by a Ubiquitous Environmental Bacterium. *Immunity* *43*, 987–997.
- Master, S.S., Rampini, S.K., Davis, A.S., Keller, C., Ehlers, S., Springer, B., Timmins, G.S., Sander, P., and Deretic, V. (2008). *Mycobacterium tuberculosis* prevents inflammasome activation. *Cell Host Microbe* *3*, 224–232.
- Mehrotra, P.T., Donnelly, R.P., Wong, S., Kanegane, H., Geremew, A., Mostowski, H.S., Furuke, K., Siegel, J.P., and Bloom, E.T. (1998). Production of IL-10 by human natural killer cells stimulated with IL-2 and/or IL-12. *J. Immunol.* *160*, 2637–2644.
- Meixenberger, K., Pache, F., Eitel, J., Schmeck, B., Hippenstiel, S., Slevogt, H., N'Guessan, P., Witznath, M., Netea, M.G., Chakraborty, T., et al. (2010). *Listeria monocytogenes*-infected human peripheral blood mononuclear cells produce IL-1 $\beta$ , depending on listeriolysin O and NLRP3. *J. Immunol.* *184*, 922–930.
- Neuenhahn, M., Kerksiek, K.M., Nauerth, M., Suhre, M.H., Schiemann, M., Gebhardt, F.E., Stemberger, C., Panthel, K., Schröder, S., Chakraborty, T., et al. (2006). CD8 $\alpha$ + dendritic cells are required for efficient entry of *Listeria monocytogenes* into the spleen. *Immunity* *25*, 619–630.
- Okamura, H., Tsutsi, H., Komatsu, T., Yutsudo, M., Hakura, A., Tanimoto, T., Torigoe, K., Okura, T., Nukada, Y., Hattori, K., et al. (1995). Cloning of a new cytokine that induces IFN- $\gamma$  production by T cells. *Nature* *378*, 88–91.
- Perona-Wright, G., Mohrs, K., Szaba, F.M., Kummer, L.W., Madan, R., Karp, C.L., Johnson, L.L., Smiley, S.T., and Mohrs, M. (2009). Systemic but not local infections elicit immunosuppressive IL-10 production by natural killer cells. *Cell Host Microbe* *6*, 503–512.
- Schmidt, R.L., and Lenz, L.L. (2012). Distinct licensing of IL-18 and IL-1 $\beta$  secretion in response to NLRP3 inflammasome activation. *PLoS ONE* *7*, e45186–e45189.
- Schmidt, R.L., Filak, H.C., Lemon, J.D., Potter, T.A., and Lenz, L.L. (2011). A LysM and SH3-domain containing region of the *Listeria monocytogenes* p60 protein stimulates accessory cells to promote activation of host NK cells. *PLoS Pathog.* *7*, e1002368.
- Schneider, B.E., Korbel, D., Hagens, K., Koch, M., Raupach, B., Enders, J., Kaufmann, S.H.E., Mittrücker, H.-W., and Schaible, U.E. (2010). A role for IL-18 in protective immunity against *Mycobacterium tuberculosis*. *Eur. J. Immunol.* *40*, 396–405.
- Schultz, M.J., Knapp, S., Florquin, S., Pater, J., Takeda, K., Akira, S., and van der Poll, T. (2003). Interleukin-18 impairs the pulmonary host response to *Pseudomonas aeruginosa*. *Infect. Immun.* *71*, 1630–1634.
- Soudja, S.M., Ruiz, A.L., Marie, J.C., and Lauvau, G. (2012). Inflammatory monocytes activate memory CD8+ T and innate NK lymphocytes independent of cognate antigen during microbial pathogen invasion. *Immunity* *37*, 549–562.
- Swaminathan, B., and Gerner-Smidt, P. (2007). The epidemiology of human listeriosis. *Microbes Infect.* *9*, 1236–1243.
- Takada, H., Matsuzaki, G., Hiromatsu, K., and Nomoto, K. (1994). Analysis of the role of natural killer cells in *Listeria monocytogenes* infection: relation between natural killer cells and T-cell receptor gamma delta T cells in the host defence mechanism at the early stage of infection. *Immunology* *82*, 106–112.
- Tate, M.D., Ong, J.D., Dowling, J.K., McAuley, J.L., Robertson, A.B., Latz, E., Drummond, G.R., Cooper, M.A., Hertzog, P.J., and Mansell, A. (2016). Reassessing the role of the NLRP3 inflammasome during pathogenic influenza A virus infection via temporal inhibition. *Sci. Rep.* *6*, 27912.
- Teixeira, H.C., and Kaufmann, S.H.E. (1994). Role of NK1.1+ cells in experimental listeriosis. NK1+ cells are early IFN- $\gamma$  producers but impair resistance to *Listeria monocytogenes* infection. *J. Immunol.* *152*, 1873–1882.
- Tomura, M., Zhou, X.-Y., Maruo, S., Ahn, H.-J., Hamaoka, T., Okamura, H., Nakanishi, K., Tanimoto, T., Kurimoto, M., and Fujiwara, H. (1998). A critical role for IL-18 in the proliferation and activation of NK1.1+ CD3- cells. *J. Immunol.* *160*, 4738–4746.
- Vivier, E., Raulet, D.H., Moretta, A., Caligiuri, M.A., Zitvogel, L., Lanier, L.L., Yokoyama, W.M., and Ugolini, S. (2011). Innate or adaptive immunity? The example of natural killer cells. *Science* *331*, 44–49.
- Vivier, E., Ugolini, S., Blaise, D., Chabannon, C., and Brossay, L. (2012). Targeting natural killer cells and natural killer T cells in cancer. *Nat. Rev. Immunol.* *12*, 239–252.
- Warren, S.E., Mao, D.P., Rodriguez, A.E., Miao, E.A., and Aderem, A. (2008). Multiple Nod-like receptors activate caspase 1 during *Listeria monocytogenes* infection. *J. Immunol.* *180*, 7558–7564.
- Witzenrath, M., Pache, F., Lorenz, D., Koppe, U., Gutbier, B., Tabeling, C., Reppe, K., Meixenberger, K., Dorhoi, A., Ma, J., et al. (2011). The NLRP3 inflammasome is differentially activated by pneumolysin variants and contributes to host defense in pneumococcal pneumonia. *J. Immunol.* *187*, 434–440.
- Wu, J., Fernandes-Alnemri, T., and Alnemri, E.S. (2010). Involvement of the AIM2, NLRC4, and NLRP3 inflammasomes in caspase-1 activation by *Listeria monocytogenes*. *J. Clin. Immunol.* *30*, 693–702.

Cell Reports, Volume 23

**Supplemental Information**

**A *Batf3/Nlrp3*/IL-18 Axis Promotes  
Natural Killer Cell IL-10 Production  
during *Listeria monocytogenes* Infection**

**Sarah E. Clark, Rebecca L. Schmidt, Daniel S. McDermott, and Laurel L. Lenz**

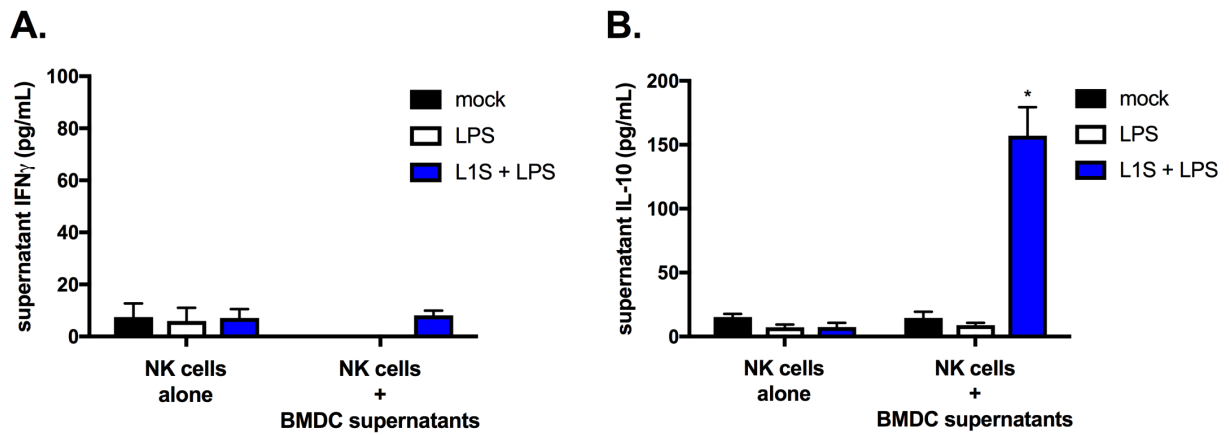

**Figure S1. Accessory cell secreted factor(s) are required for NK cell IL-10.** *Related to Figure 1.*

(A-B) Supernatant cytokines detected from NK cell cultures at 24 h (IFN $\gamma$ , A) or 72 h (IL-10, B) post-stimulation with LPS or L1S+LPS directly (NK cells alone) or exposure to filtered supernatants collected 1 h post-stimulation of B6.*il10*<sup>-/-</sup> BMDCs with LPS or L1S+LPS (NK cells + BMDC supernatants). Data were pooled from three independent experiments and are displayed as mean  $\pm$  SEM with \* $p < .05$  as measured by *t*-test.



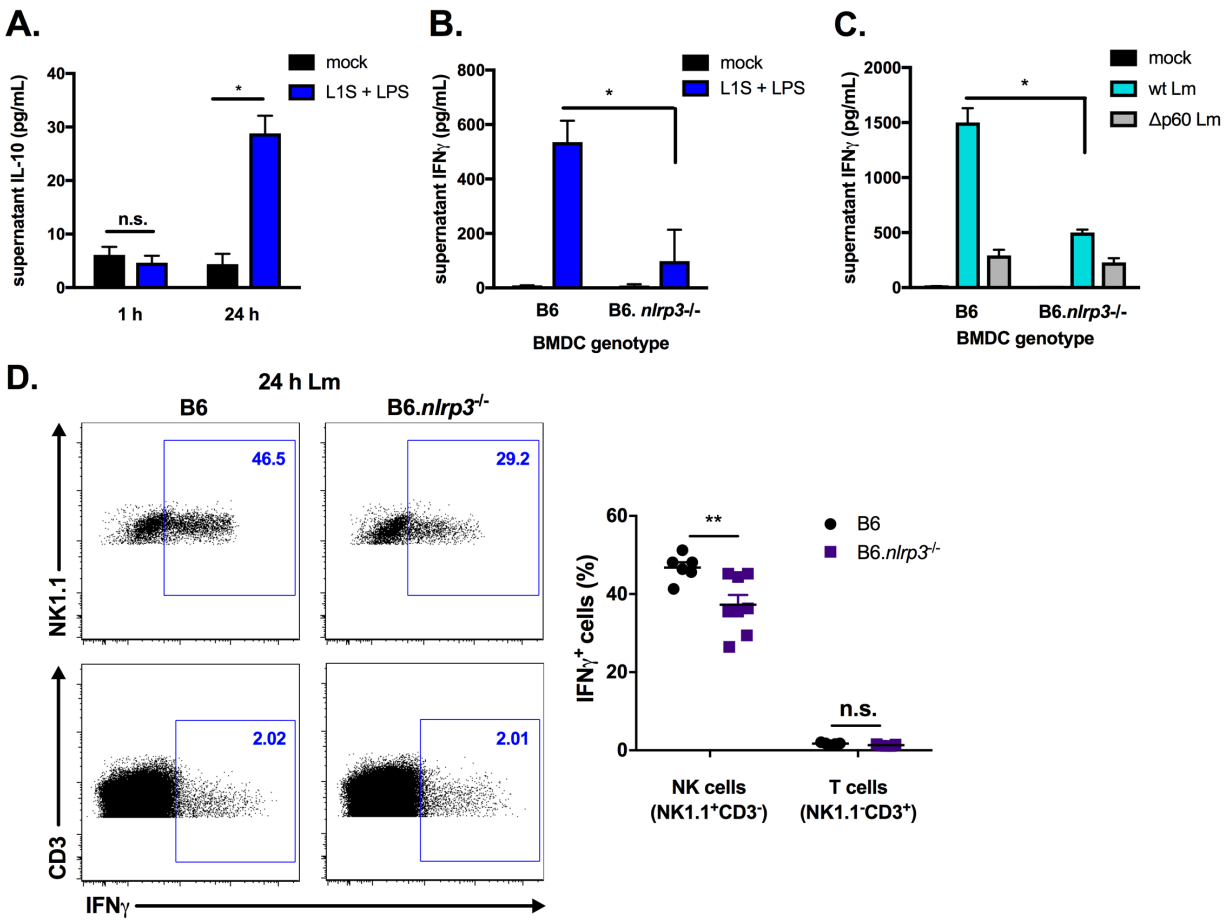

**Figure S2. NLRP3 is required for Lm-induced NK cell IFN $\gamma$ .** Related to Figure 2.

(A) B6 BMDC cell culture supernatant IL-10 detected at indicated time points post-stimulation with L1S+LPS ( $n = 3$  independent experiments pooled). (B-C) Supernatant IFN $\gamma$  detected from NK cell cultures at 24 h post co-culture with B6 or B6.nlrp3<sup>-/-</sup> BMDCs stimulated with L1S+LPS (B) or infected with WT or  $\Delta$ p60 Lm (C), ( $n = 3$  independent experiments pooled). (D) Intracellular IFN $\gamma$  produced by NK1.1<sup>+</sup>CD3<sup>-</sup> cells (NK cells) or NK1.1<sup>-</sup>CD3<sup>+</sup> cells (T cells) detected from mice at 24 hpi with 10<sup>4</sup> Lm i.v. ( $n = 2$  experiments with 3-5 mice per group). Data are displayed as mean  $\pm$  SEM with \* $p < .05$ , \*\* $p < .01$  as measured by  $t$ -test.

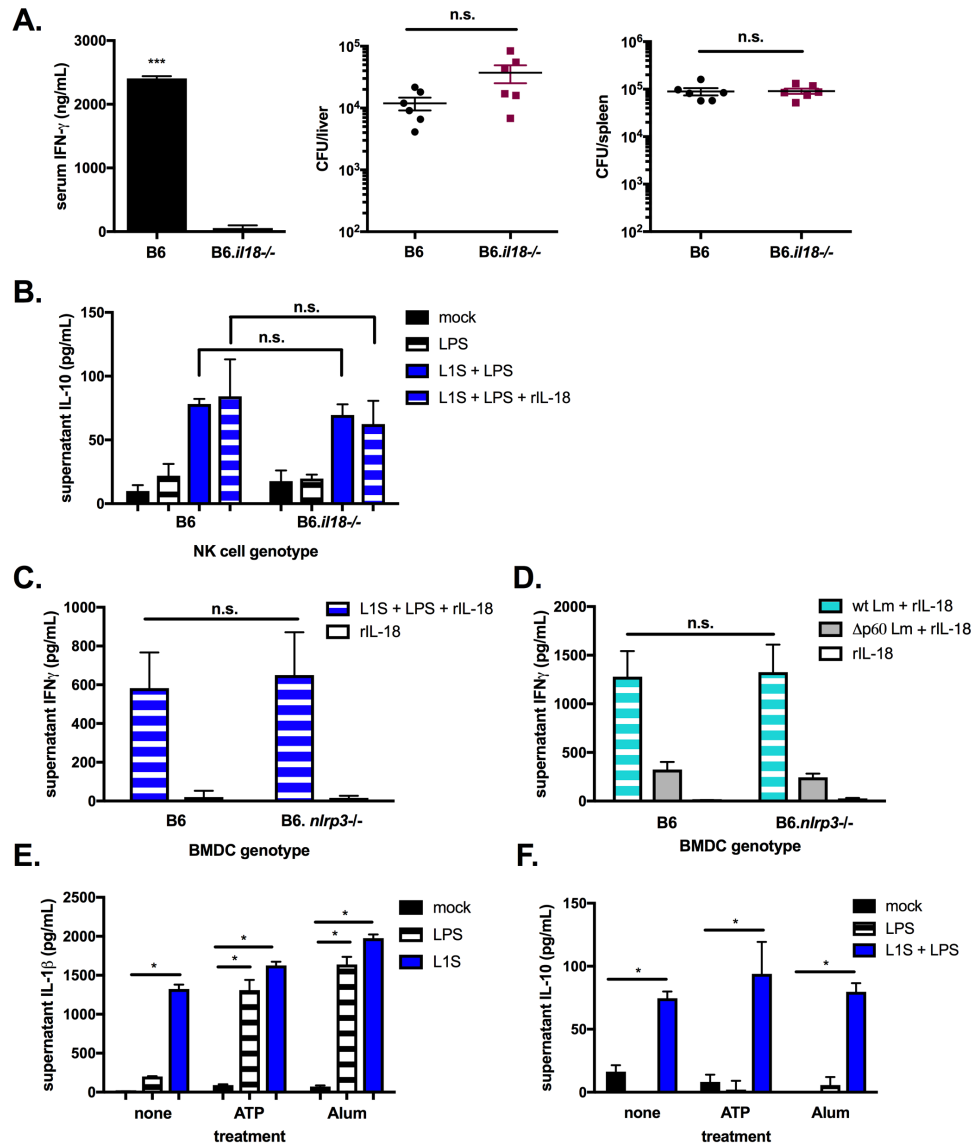

**Figure S3. The contribution of IL-18 to Lm-induced IFN $\gamma$ .** Related to Figure 3.

(A) Serum IFN $\gamma$  and Lm burdens per organ from B6 or *B6.il18<sup>-/-</sup>* mice sacrificed 24 hpi with  $10^4$  Lm i.v. ( $n = 2$  experiments with 3-5 mice per group). (B) Supernatant IL-10 detected from B6 or *B6.il18<sup>-/-</sup>* NK cells at 72 h post exposure to filtered supernatants collected 1 h post-stimulation of B6 BMDCs with L1S+LPS  $\pm$  50 pg/mL rIL-18 added to NK cell cultures ( $n = 3$  independent experiments pooled). (C-D) Supernatant IFN $\gamma$  detected from NK cell cultures at 24 h post co-culture with B6 or *B6.nlrp3<sup>-/-</sup>* BMDCs stimulated with L1S+LPS (C) or infected with WT or  $\Delta$ p60 Lm (D) + 50 pg/mL rIL-18 added to co-cultures ( $n = 3$  independent experiments pooled). (E) Supernatant IL-1 $\beta$  detected at 24 h from BMDC cell cultures post-stimulation with ATP  $\pm$  LPS (3 h LPS pre-stimulation and 30 min ATP stimulation) or Alum  $\pm$  LPS (3 h LPS pre-stimulation and 1 h Alum stimulation)  $\pm$  L1S ( $n = 3$  independent experiments pooled). (F) Supernatant IL-10 detected from NK cells at 72 h following exposure to filtered supernatants collected from B6 BMDCs stimulated with ATP  $\pm$  LPS or Alum  $\pm$  LPS  $\pm$  L1S at 1 h post (final) stimulation ( $n = 3$  independent experiments pooled). Data are displayed as mean  $\pm$  SEM with \* $p < .05$ , \*\*\* $p < .001$  as measured by  $t$ -test.

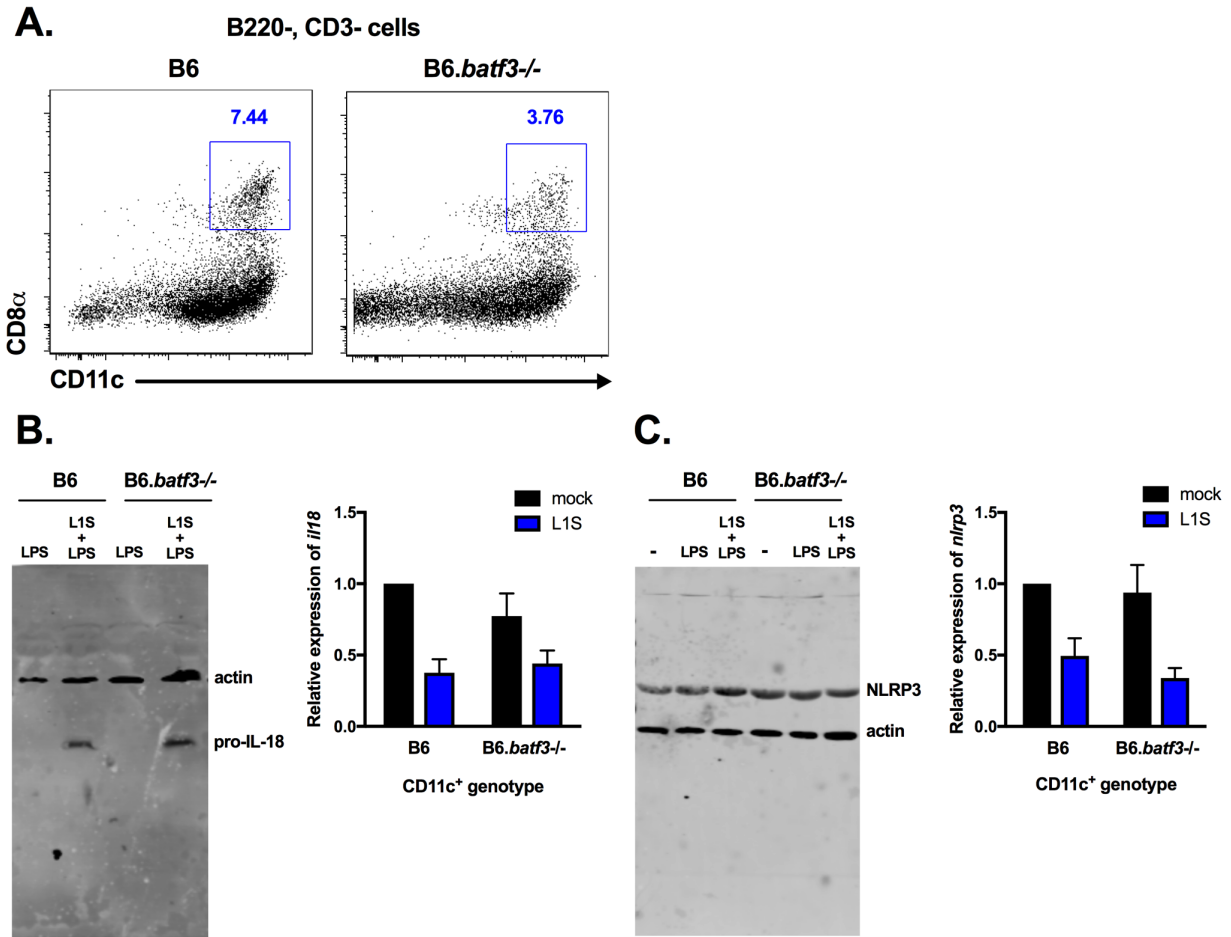

**Figure S4. IL-18 and NLRP3 are expressed in *Batf3*-deficient DCs. Related to Figure 5.**

(A) CD8 $\alpha$ <sup>+</sup>CD11c<sup>+</sup> cells detected by flow cytometry from B220<sup>-</sup>CD3<sup>-</sup> gate of purified CD11c<sup>+</sup> cells from B6 or B6.*batf3*<sup>-/-</sup> mice (representative from  $n = 3$  experiments). (B-C) Western blots of cell lysate pro-IL-18 protein (and actin protein loading control) and relative expression of *il18* detected by qRT-PCR (B) or cell lysate NLRP3 protein (and actin protein loading control) and relative expression of *nlrp3* (C) from CD11c<sup>+</sup> cells purified from B6 versus B6.*batf3*<sup>-/-</sup> mice stimulated with L1S+LPS for 24 h (representative from  $n = 3$  experiments).

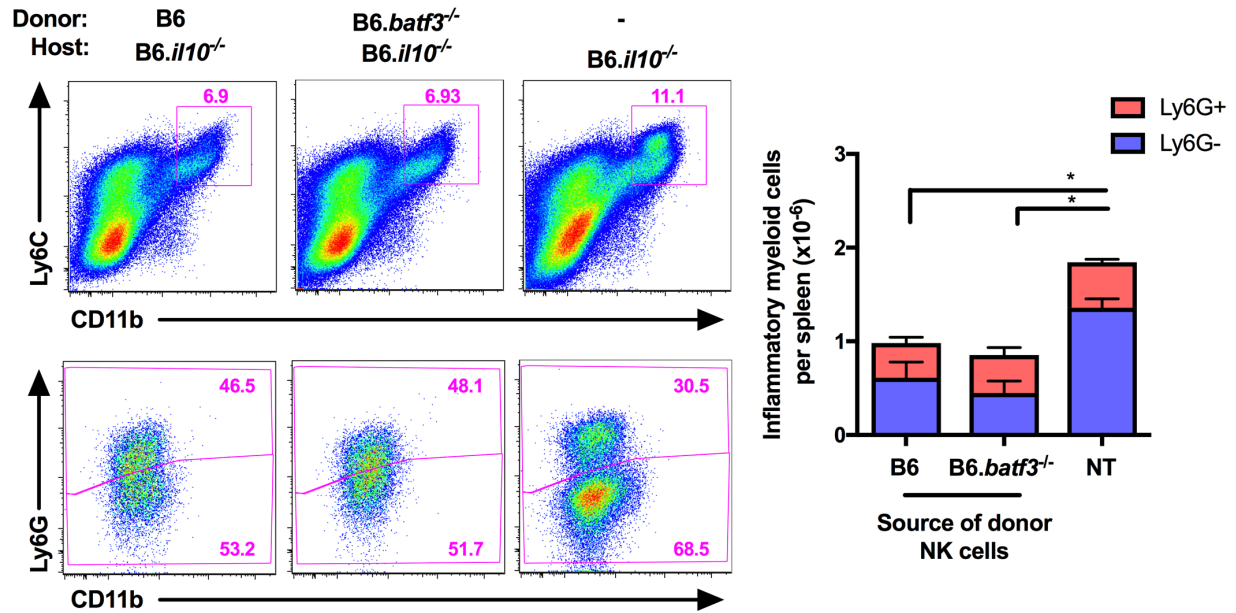

**Figure S5. Non-NK Batf3-dependent cells limit inflammatory myeloid cell recruitment.** Related to Figure 6.

Ly6C<sup>+</sup>CD11b<sup>+</sup> inflammatory myeloid cells and Ly6G<sup>+</sup>CD11c<sup>+</sup> cells within the inflammatory myeloid cell gate detected by flow cytometry from the spleens of B6.il10<sup>-/-</sup> recipient mice at 96 hpi with 10<sup>4</sup> Lm i.v. following transfer of donor purified splenic NK cells from B6 or B6.batf3<sup>-/-</sup> mice at 24 hpi. NT = no transfer (*n* = 3 experiments with 3-5 mice per group). Data are displayed as mean ± SEM with \**p* < .05 as measured by *t*-test.

## **Supplemental Experimental Procedures**

### *Co-cultures*

For co-culture experiments, BMDCs were cultured 6 days in GM-CSF and  $3 \times 10^5$  BMDCs (>90% CD11c<sup>+</sup>) were plated per well overnight in 24 well plates. For infections, log phase WT or  $\Delta p60$  Lm were added at a multiplicity of one bacterium per BMDC. One hour later, cells were washed and gentamycin was added at 10  $\mu\text{g}/\text{mL}$ . For L1S stimulations, BMDCs were activated for one hour by treatment with 10 ng/mL LPS (L8274 Sigma-Aldrich) and 30  $\mu\text{g}/\text{mL}$  purified L1S protein. Purified splenic NK cells were added to cultures 2 h after Lm or L1S+LPS treatments at a ratio of 1:10 (NK cells:BMDCs). Supernatants were harvested for analysis of IFN $\beta$ , IL-18, IL-6, IL-12p70, IFN $\gamma$  and IL-10 at indicated time points using commercial ELISAs (BD Biosciences or eBioscience).

### *Cell stimulations*

Cytokines and inhibitors were added to co-cultures or filtered supernatants at the time of NK cell addition. For cytokine stimulations, 50 ng/mL of rIL-12, rIL-2, or rIL-18 (BioLegend) were added as indicated. To inhibit STAT4, lisofylline (Sigma-Aldrich) was added at a concentration of 80 mM. To inhibit IL-12R, purified anti-IL-12R (CD212, BD Pharmingen) was added at a concentration of 50  $\mu\text{g}/\text{mL}$ . To inhibit IL-12p70, anti-IL-12p70 (R2-9A5, BioXcell) was added at a concentration of 1  $\mu\text{g}/\text{mL}$ . For ATP and Alum BMDC stimulations,  $3 \times 10^5$  cells BMDCs were plated overnight and pre-stimulated with 10 ng/mL LPS for 3 h, followed by 5 mM ATP for 30 min (Sigma-Aldrich) or 300  $\mu\text{g}/\text{mL}$  Alum for 1 h (Sigma-Aldrich). Supernatants were collected 24 h post-stimulation for cytokine detection.

### *Flow cytometry*

Single cell suspensions were stained for flow cytometry analysis. Spleens and livers were harvested into media containing 1 mg/mL type 4 collagenase (Worthington) in HBSS plus cations (Invitrogen). Organs were incubated for 30 min at 37°C and single cell suspensions were created by passage through a 70  $\mu\text{m}$  strainer. Livers were re-suspended in 40% Percoll in HBSS minus cations, then underlayered with 60% Percoll. Gradients were centrifuged 20 min at 1625 x g. Leukocytes were collected from the interface using a Pasteur pipet and diluted in RPMI with 5% FBS. Cells were pelleted and re-suspended in HBSS plus cations (Sigma-Aldrich). Cells from the blood were harvested in HBSS plus cations and heparin (Sigma-Aldrich). Red blood cells were removed from all cell preparations by treatment with RBC lysis buffer (0.15 M NH<sub>4</sub>Cl, 10 mM KHC0<sub>3</sub>, 0.1 mM Na<sub>2</sub>EDTA, pH 7.4).

Anti-CD16/32 (2.4G2 hybridoma supernatant) was added to single cell suspensions and incubated for 30 min to block Fc receptors. Cells were pelleted and staining was completed in FACS buffer (1% BSA, 0.01% NaN<sub>3</sub>, PBS). Antibodies for staining included anti-CD3 (clone 1452C11), NK1.1 (clone PK136), CD8 $\alpha$  (clone 53-6), CD11c (N418), B220 (clone RA3-6B2), IL-18R1 (clone BG/IL18RA), CD45.1 (clone A20), CD45.2 (clone 104), and IFN $\gamma$  (clone XMG1.2). All antibodies were purchased from eBioScience or BioLegend. Following surface staining, cells were fixed with 2% paraformaldehyde. For intracellular staining, cells were permeabilized using 1 mg/mL saponin treatment. Prior to intracellular staining cells were incubated in RP10 media (RPMI 1640, Sigma, 10% FBS, 1% L-glutamine, 1% Sodium Pyruvate, 1% Penicillin, 1% Streptomycin and 0.1%  $\beta$ -ME) with Brefeldin A (BD Biosciences). To amplify the IL-10 GFP signal in samples from B6.tiger mice, an intracellular stain was done using rabbit monoclonal anti-GFP followed by goat anti-rabbit IgG Alexa Fluor 488 (Life Technologies) as previously described (Tarrío et al., 2014). A minimum of 100,000 events per sample were collected using an LSRII (BD Biosciences). FlowJo software (Treestar) was used for data analysis.

### *Western Blotting*

Protein levels of IL-18 and NLRP3 were detected by western blotting of equivalent cell lysates loaded onto a 10% SDS-PAGE gel following semi-dry transfer onto a nitrocellulose membrane and blocking with 5% milk in PBST (PBS + 0.5% Tween-20, Sigma) for 2 h. Membranes were probed with primary antibodies against IL-18 (clone 39-

3F, MBL), NLRP3/NALP3 (clone Cryo-2, Adipogen), and  $\beta$ -Actin (clone 8H10D10, Cell Signaling) followed by secondary antibodies against mouse IgG. Protein expression was detected on an Oyssey Scanner (LI-COR).

#### *Quantitative Real-time PCR*

Expression of *il18* and *nlrp3* was detected using a quantitative PCR machine (Bio-Rad) on cDNA samples prepared from RNA preparations using reverse transcriptase and an RNA extraction kit (Bio-Rad). Primers for transcript detection included *il18*F: ACTGTACAACCGCAGTAATACGG and *il18*R: AGTGAACATTACAGATTTATCCC (Kim et al., 2000) and *nlrp3*F: CCCTTGGAGACACAGGACTC and *nlrp3*R: GAGGCTGCAGTTGTCTAATCC (He et al., 2012).

#### **Supplemental References**

- Y. M. Kim, J. Y. Im, S. H. Han, H. S. Kang, I. Choi, 2000. IFN-gamma Up-Regulates IL-18 Gene Expression Via IFN Consensus Sequence-Binding Protein and Activator Protein-1 Elements in Macrophages. *The Journal of Immunology* 165, 3198–3205.
- Y. He, L. Franchi, G. Nunez, 2012. TLR Agonists Stimulate Nlrp3-Dependent IL-1beta Production Independently of the Purinergic P2X7 Receptor in Dendritic Cells and In Vivo. *The Journal of Immunology* 190, 334–339.
- M.L. Tarrio, S.-H. Lee, M.F. Fragoso, H.-W. Sun, Y. Kanno, J.J. O’Shea, and C.A. Biron, 2014. Proliferation Conditions Promote Intrinsic Changes in NK Cells for an IL-10 Response. *J. Immunol.* 193, 354–363.
